**Title:** Single voxel autocorrelation uncovers gradients of temporal dynamics in the hippocampus and entorhinal cortex during rest and navigation

**Authors:** Nichole R. Bouffard<sup>\*1,2</sup>, Ali Golestani<sup>\*1</sup>, Iva K. Brunec<sup>3</sup>, Buddhika Bellana<sup>1,4</sup>, Morgan D. Barense<sup>†1,2</sup>, Morris Moscovitch<sup>†1,2</sup>

\* These authors contributed equally

† Shared senior authorship

## Affiliations

<sup>1</sup>Department of Psychology, University of Toronto, Toronto, Ontario, Canada

<sup>2</sup>Rotman Research Institute, Baycrest Health Sciences, North York, Ontario, Canada

<sup>3</sup>Department of Psychology, Temple University, Philadelphia, Pennsylvania, USA

<sup>4</sup>Department of Psychology, Glendon College - York University, Toronto, Ontario, Canada

## Abstract

During navigation, information at multiple scales needs to be integrated. Single-unit recordings in rodents suggest that gradients of temporal dynamics in the hippocampus and entorhinal cortex support this integration. In humans, gradients of representation are observed, such that granularity of information represented increases along the long axis of the hippocampus. The neural underpinnings of this gradient in humans, however, are still unknown. Current research is limited by coarse fMRI analysis techniques that obscure the activity of individual voxels, preventing investigation of how moment-to-moment changes in brain signal are organized and how they are related to behavior. Here, we measured the signal stability of single voxels over time to uncover previously unappreciated gradients of temporal dynamics in the hippocampus and entorhinal cortex. Using our novel, single voxel autocorrelation technique, we show for the first time a medial-lateral hippocampal gradient, as well as a continuous autocorrelation gradient along the anterolateral-posteromedial entorhinal extent. Importantly, we show that anterior-posterior and medial-lateral hippocampal autocorrelation gradients were modulated by navigational difficulty, indicating that changes in signal stability are relevant for behavior. Our method and findings open the door for future research on how temporal gradients within these structures support the integration of information for goal-directed behavior.

## **Acknowledgments**

We thank Menno Witter for his feedback on an earlier draft of this paper. Dataset 1 was provided by the Human Connectome Project, WU-Minn Consortium (Principal Investigators: David Van Essen and Kamil Ugurbil; 1U54MH091657) funded by the 16 NIH Institutes and Centers that support the NIH Blueprint for Neuroscience Research; and by the McDonnell Center for Systems Neuroscience at Washington University. We thank Jason Ozubko for his contributions to the experiment conceptualization of and data collection for Dataset 2. MDB was supported by the Natural Sciences and Engineering Research Council Discovery Grant (RGPIN-2020-05747), a James S McDonnell Scholar Award, an Early Researcher Award from the Ontario Ministry of Development and Innovation, and a Canada Research Chair. MM was supported by the Canadian Institutes of Health Research Grant (MOP 125958).

## **Conflict of interest statement**

The authors declare no competing financial interests.

## 1 **Introduction**

2

3 To enable efficient goal-directed behaviour, information must be represented and  
4 integrated across multiple temporal and spatial scales. It has been proposed that  
5 neural signal gradients in the hippocampus and entorhinal cortex support such  
6 multi-scale representations in rodents, but evidence in humans is sparse and has  
7 methodological limitations. Previously, fMRI analysis techniques have uncovered  
8 local signal gradients in the human hippocampus (Brunec, Bellana, et al., 2018).  
9 These investigations, however, have been limited by analyzing patterns of  
10 activity across relatively coarse regions of interest, making it unclear how  
11 sustained versus rapidly changing signals are distributed throughout the  
12 hippocampus. Many of these analyses use predetermined anterior and posterior  
13 anatomical masks, which limit our ability to detect neural signal gradients in an  
14 unsupervised way, therefore preventing us from investigating gradients that exist  
15 along both anterior-posterior and medial-lateral axes of the hippocampus.  
16 Moreover, there have been no prior investigations of autocorrelation gradients in  
17 the entorhinal cortex, despite evidence of its role in spatial and temporal  
18 representations during navigation. To address these limitations, we have  
19 developed a novel, data-driven analysis based on autocorrelation of single voxels  
20 in fMRI during rest and navigation. This technique allows us, for the first time, to  
21 track the signal stability of individual voxels and their spatial distribution in an  
22 unconstrained way along both the anterior-posterior and medial-lateral axes of  
23 the hippocampus and entorhinal cortex. Based on this single voxel analysis we  
24 uncover gradients of neural signal dynamics along these axes in both structures  
25 and relate them to behavior.

26

27 In rodents, place fields in the ventral hippocampus (homologous to the anterior  
28 hippocampus in humans) span larger areas, show a higher degree of overlap,  
29 and higher correlation in their firing across time, compared to the dorsal  
30 hippocampus (homologous to the posterior hippocampus in humans) (Hasselmo,  
31 2008; Jung et al., 1994; Kjelstrup et al., 2008; Komorowski et al., 2013). A similar  
32 gradient of hippocampal organization is also observed in the human  
33 hippocampus. Tracking moment-to-moment similarity across patterns of voxels  
34 during virtual navigation, Brunec, Bellana, et al. (2018) found that signal similarity  
35 was significantly greater within the anterior hippocampus relative to the posterior  
36 hippocampus, indicating that, as in the rodent ventral hippocampus, the human  
37 anterior hippocampus demonstrates slower changing signals that are sustained  
38 across time and space. These results suggest that a relatively stable pattern of  
39 activity in the rodent and human hippocampus follows a scaled gradient, from  
40 faster changing signal in the posterior (dorsal) hippocampus to slower changing

41 signal in the anterior (ventral) hippocampus. This gradient organization might  
42 underlie fine-to-coarse mnemonic representation, particularly when a different  
43 granularity of information needs to be maintained across time (Brunec &  
44 Momennejad, 2019; Robin & Moscovitch, 2017). In addition to the dorsal-ventral  
45 gradient of spatial representation observed in rodents, research suggests a  
46 difference in spatial selectivity along the proximodistal axis (homologous to  
47 medial-lateral in humans), specifically in CA1 (Igarashi et al., 2014), yet whether  
48 a similar medial-lateral distinction exists in the human hippocampus is still  
49 unclear (Hrybouski et al., 2019).

50

51 A key input structure to the hippocampus that has been implicated in integrating  
52 information over time during navigation is the entorhinal cortex. Prior research  
53 has found distinct functional differentiation between the anterolateral and  
54 posterior-medial aspects of the entorhinal cortex (ERC), but there have been no  
55 prior investigations of neural signal gradients in the ERC. The lateral ERC in  
56 rodents, and the homologous anterolateral ERC in humans, supports within-  
57 object and object-location coding, as well as temporal information processing  
58 (Bellmund et al., 2019; Montchal et al., 2019; Olsen et al., 2017; Tsao et al.,  
59 2018; Yeung et al., 2017; 2019). In contrast, the posteromedial ERC in humans,  
60 has been primarily linked to scene processing (Berron et al., 2018; Maass et al.,  
61 2015; Navarro Schröder et al., 2015) and related to grid cell organization  
62 (Bellmund et al., 2016), consistent with evidence of grid cells in the medial ERC  
63 in rodents (Hafting et al., 2005). Given prior evidence of functional distinctions of  
64 the ERC into anterolateral and posteromedial regions, we developed a data-  
65 driven method to investigate directly, a continuous neural signal gradient in both  
66 the anterior-posterior and medial-lateral axes of this structure.

67

68 To understand how a graded organization of signal dynamics in the hippocampus  
69 and ERC supports goal-directed behavior, we developed an analytic approach of  
70 temporal autocorrelation at the single voxel level, which we implemented during  
71 both rest and navigation. Temporal autocorrelation represents the degree of  
72 similarity between a signal and the temporally shifted, or lagged, version of the  
73 signal over successive time intervals (Figure 1A). Conventionally, it is assumed  
74 that this autocorrelation in fMRI data originates from physical and physiological  
75 noise (Arbabshirani et al., 2014; Bollmann et al., 2018; Bullmore et al., 2001;  
76 James et al., 2019; Lenoski et al., 2008; Lund et al., 2006; Purdon & Weisskoff,  
77 1998) or the hemodynamic response function (Arbabshirani et al., 2014; James  
78 et al., 2019; Rajapakse et al., 1998) and, therefore, has been considered  
79 irrelevant to brain function. Recently, however, Arbabshirani et al. (2019) found  
80 that autocorrelation reflects changes in cognitive state (task vs. rest) as well as

81 changes in mental state (healthy control vs. schizophrenia), suggesting that the  
82 observed changes in the autocorrelation are also modulated by cognitive  
83 processes. Prior studies, however, have been limited and are unable to answer  
84 the question of how temporal autocorrelation is directly related to behavior.  
85 Examining the temporal autocorrelation of single voxels during an active  
86 navigation task, therefore, is important for understanding how a stable, highly  
87 correlated signal is relevant for behavior.

88

89 Investigating the fMRI signal at the single voxel level allows us to measure neural  
90 gradients with more precision than previous methods. While studies with fMRI in  
91 humans suggest that functional heterogeneity exists along the long axis of the  
92 hippocampus (Nadel et al., 2013; Poppenk et al., 2013; see Grady, 2020 for a  
93 review) and medial-lateral extent of the ERC (e.g., Hafting et al., 2005; Maass et  
94 al., 2015; Navarro Schröder et al., 2015), previous analysis techniques have  
95 been limited to investigations using predetermined anatomical masks, which  
96 obscures the contribution of individual voxels, making it unclear whether graded  
97 signals extend along multiple axes in these regions. Furthermore, examining the  
98 autocorrelation at the single voxel level allows for a finer-grained analysis that  
99 may be more sensitive to differences in navigational performance and can help  
100 us to determine how a scaled gradient of signal similarity might be employed to  
101 integrate representations across spatial scales during navigation. We, therefore,  
102 combine our single voxel autocorrelation approach with an unconstrained  
103 clustering method to determine how temporal autocorrelation is distributed in  
104 multiple dimensions throughout the hippocampus and ERC.

105

106 Here we present the first evidence of a medial-lateral neural signal gradient in the  
107 hippocampus as well as a novel continuous gradient in the ERC. Using resting  
108 state fMRI data with high spatial and temporal resolution from the Human  
109 Connectome Project (HCP), we measured single voxel autocorrelation in the  
110 hippocampus and ERC. Specifically, we measured the similarity of single voxels  
111 over time by correlating the timecourse of each voxel with temporally shifted  
112 versions of itself (Figure 1A). We applied data-driven clustering to determine how  
113 temporal autocorrelation was spatially distributed throughout the hippocampus  
114 and ERC. We found high autocorrelation in the anterior-medial hippocampus and  
115 posteromedial ERC and low autocorrelation in the posterior-lateral hippocampus  
116 and anterolateral ERC. Using task-based fMRI, we replicated these results and  
117 also demonstrated that increases in navigation difficulty were associated with  
118 increases in autocorrelation in the anterior-medial hippocampus. Our single voxel  
119 autocorrelation approach yields consistent and precise gradients of single voxel  
120 autocorrelation in the hippocampus and ERC, providing a powerful new

121 continuous and data-driven method that can illuminate how temporal dynamics in  
122 brain signals relate to complex cognition.

123

## 124 **Results**

125

### 126 **Dataset 1: Resting state fMRI**

#### 127 **Hippocampus**

##### 128 ***Spatial distribution of single voxel autocorrelation***

129 To examine hippocampal dynamics at the single voxel level when no cognitive  
130 demands were placed on participants, we first analyzed resting-state fMRI data  
131 from 44 participants from the Human Connectome Project (HCP) Retest dataset  
132 (2 runs per participant). Here, we correlated the timecourse of activity of each  
133 voxel in the hippocampus with activity in that same voxel shifted by a temporal  
134 lag of 1 TR (Dataset 1 TR = 720 ms). We repeated this process until a maximum  
135 temporal shift of 4 seconds was reached, or 5 lags (Figure 1A). A map of single  
136 voxel autocorrelation values throughout the hippocampus was generated for  
137 each lag separately (for a theoretical schematic, see Figure 1B).

138

139 We found that single voxel autocorrelation maps at the group level (lags 1-5)  
140 showed a notable difference in the distribution of single voxel autocorrelation  
141 values along the hippocampal axis (Figure 2A). More specifically, voxels with  
142 higher single voxel autocorrelation were mainly in the anterior-medial region  
143 whereas voxels with lower single voxel autocorrelation were mainly in the  
144 posterior-lateral region (in both left and right hippocampus). As shown in Figure  
145 2A, although the overall autocorrelation decreased as the lag increased, the  
146 overall pattern of autocorrelation gradients was similar for lags 1-5.

147

##### 148 ***Single voxel autocorrelation – Reliability results***

149 We next tested the reliability of these results. Here we defined a reliable result as  
150 one in which single voxel autocorrelation vectors generated from two runs of the  
151 *same* participant were more similar than two runs from *different* participants  
152 (lower intra-subject Euclidean distances compared to inter-subject Euclidean  
153 distances). Nonparametric permutation tests comparing intra-subject and inter-  
154 subject Euclidean distance revealed reliable results in both the left (intra-subject:  
155  $7.43 \pm 2.07$ , inter-subject:  $9.38 \pm 2.22$ ,  $P < 0.0001$ ) and right hippocampus (intra-  
156 subject:  $7.22 \pm 1.98$ , inter-subject:  $9.02 \pm 2.02$ ,  $P < 0.0001$ ) (Figure 3A). These  
157 high intra-subject similarity values suggest that the single voxel autocorrelation  
158 pattern is an intrinsic feature of the brain, likely originating from neuronal  
159 sources, rather than noise or imaging artifacts.

160

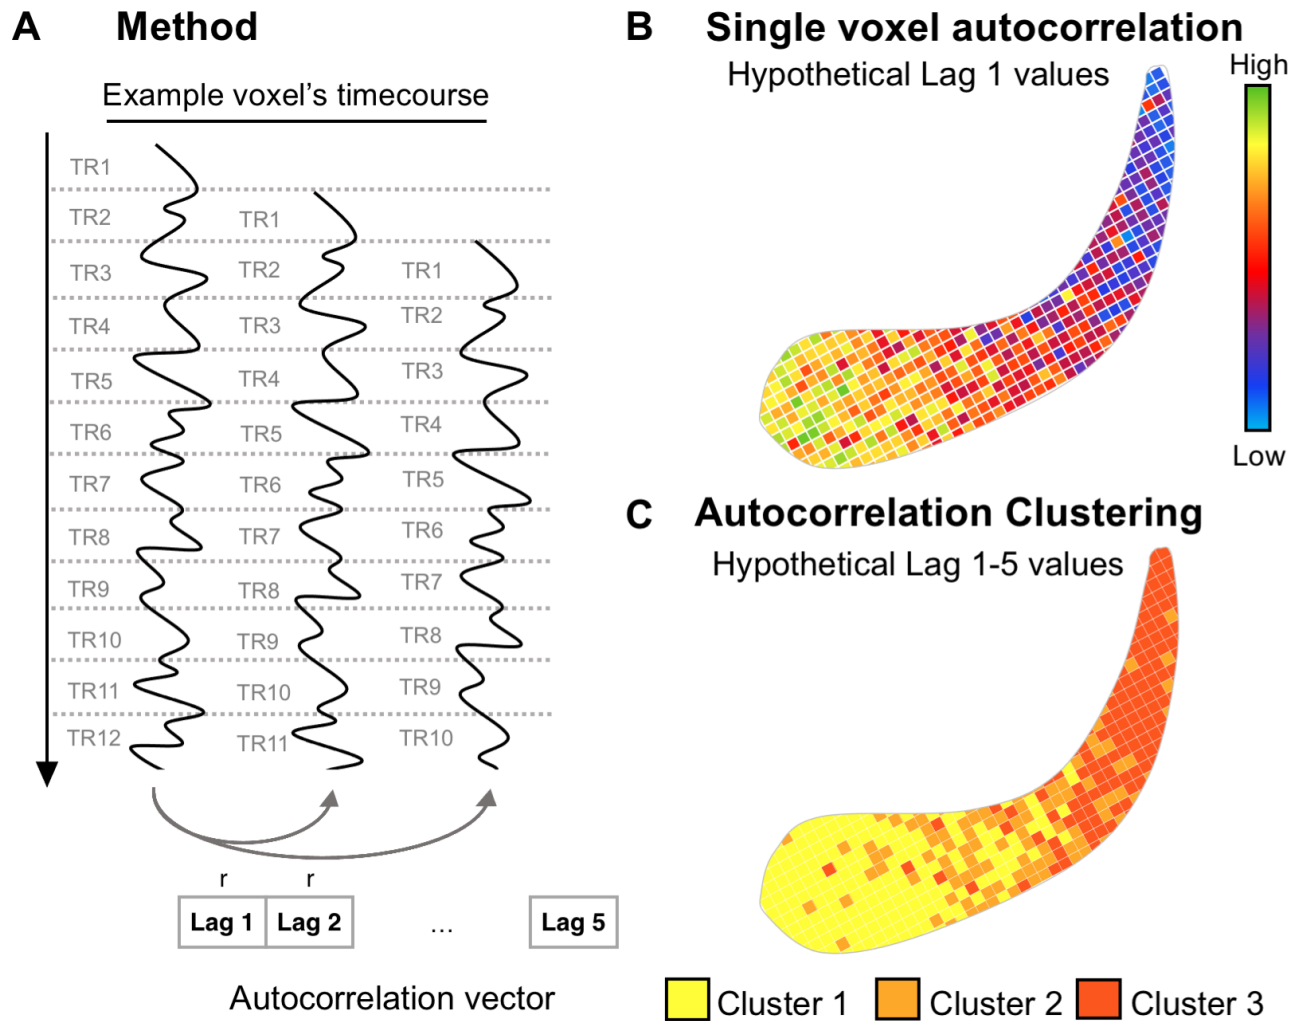

162

163 **Figure 1. A) Method.** For each voxel, the timecourse of activity was successively  
 164 temporally shifted by 1 TR and correlated with itself. This was repeated for a total shift of  
 165 4 seconds (i.e., 5 lags for resting state data (Dataset 1) and 2 lags for navigation data  
 166 (Dataset 2)). This resulted in a vector of single voxel autocorrelation values, with each  
 167 value corresponding to a different lagged correlation. **B) Single voxel autocorrelation**  
 168 **(hypothetical values).** The procedure was repeated for all voxels in an ROI. To  
 169 examine the spatial distribution of the single voxel autocorrelation, we plot the group-  
 170 level single voxel autocorrelation maps for each lag, averaged across runs and  
 171 participants. **C) Autocorrelation clustering (hypothetical values).** The autocorrelation  
 172 values for each lag were stored in a vector (single voxel autocorrelation vector). The  
 173 voxels in the ROI were clustered based on the similarity (Euclidean distance) of single  
 174 voxel autocorrelation vectors. Single voxel autocorrelation vectors were clustered  
 175 according to their Euclidean distance (Blondel et al., 2008). Clustering was performed at  
 176 the individual-level and at the group-level.

177



## 178 **Autocorrelation Clustering**

179 We applied a Louvain clustering method using modularity maximization without  
180 predefining the number of clusters (Blondel et al., 2008) to the group-level single  
181 voxel autocorrelation vectors (for a theoretical schematic, see Figure 1C). This  
182 data-driven clustering approach revealed three distinct clusters in both the left  
183 and right hippocampus (Figure 2B); notably, past work that segmented the  
184 hippocampus into two ROIs (anterior and posterior) a priori would not have been  
185 able to detect the presence of this third cluster. Consistently across all 5 lags we  
186 found that Cluster 1 had the highest single voxel autocorrelation values and was  
187 located in the anterior-medial hippocampus (Figure 2D). Cluster 3 had the lowest  
188 single voxel autocorrelation values and was located in the posterior-lateral part of  
189 the hippocampus. Cluster 2 had intermediate single voxel autocorrelation values  
190 and was located between Clusters 1 and 3. These three clusters were also  
191 reliably observed at the individual level (cluster maps from two runs of an  
192 example participant are shown in Figure 2B).

193

194 In summary, clustering revealed a high-to-low single voxel autocorrelation  
195 gradient along the anterior-posterior axis, consistent with what has been  
196 previously found in the literature (Brunec, Bellana, et al., 2018; Raut et al., 2020).  
197 In addition, we found differences along the medial-lateral axis, as well as a  
198 prominent anterior-medial cluster of high single voxel autocorrelation that could  
199 be distinguished from a posterior-lateral cluster of low single voxel  
200 autocorrelation. While previous methods using predetermined anterior/posterior  
201 ROI masks might have missed this medial-lateral distinction, our data-driven  
202 method provides evidence that an autocorrelation gradient exists along multiple  
203 spatial dimensions.

204

## 205 **Autocorrelation Clustering – Reliability results**

206 The reliability of single voxel autocorrelation clustering was evaluated by  
207 measuring spatial overlap between clusters, calculated by the Jaccard coefficient  
208 (Figure 3B). Here we defined a reliable result as one in which the spatial  
209 distribution of autocorrelation clusters was consistent across the two runs of the  
210 same participant, indicated by greater overlap (higher Jaccard coefficient) among  
211 clusters *within* an individual compared to *between* different individuals. Using  
212 nonparametric permutation, we found high reliability for clusters in the bilateral  
213 hippocampus, specifically Cluster 1 (Left:  $P < 0.001$ ; Right:  $P < 0.001$ ) and  
214 Cluster 3 (Left:  $P < 0.001$ ; Right:  $P < 0.001$ ). These findings of high intra- and  
215 inter-subject overlap suggest that Clusters 1 and 3 were highly reliable, within  
216 individuals. Cluster 2, however, had significantly lower overlap (Left:  $P = 0.06$ ;  
217 Right:  $P = 0.007$ ), suggesting more variability within individuals.

218 ***Gradients of single voxel autocorrelation (lag 1)***

219 The single voxel autocorrelation and autocorrelation clustering results presented  
220 above both suggest the presence of an autocorrelation gradient along two main  
221 axes: the anterior-posterior axis and the medial-lateral axis. To more precisely  
222 examine these individual gradients, we plotted the single voxel autocorrelation  
223 across hippocampal slices along the X (medial-lateral), Y (posterior-anterior), and  
224 Z (inferior-superior) axes. We observed consistent gradients in every participant.  
225 Specifically, single voxel autocorrelation gradually decreased in the medial-to  
226 lateral direction and increased in the posterior-to-anterior direction (Figure 2C;  
227 we focused on lag 1, but a similar pattern was revealed across all lags, as shown  
228 in Figure 2A). A rough gradient of high-to-low autocorrelation was also observed  
229 in the inferior-superior axis, which is due to the angle of the hippocampus (i.e.,  
230 the anterior hippocampus is located more inferiorly relative to the posterior  
231 hippocampus). When we investigated the spatial distribution of the three clusters  
232 (projected on the background of the plots in Figure 2C), we observed a gradient  
233 of cluster assignment that complemented the single voxel autocorrelation  
234 gradients. Specifically, high-to-low single voxel autocorrelation gradients were  
235 also associated with a cluster gradient from Cluster 1 to Cluster 3.

236

237

## Hippocampus

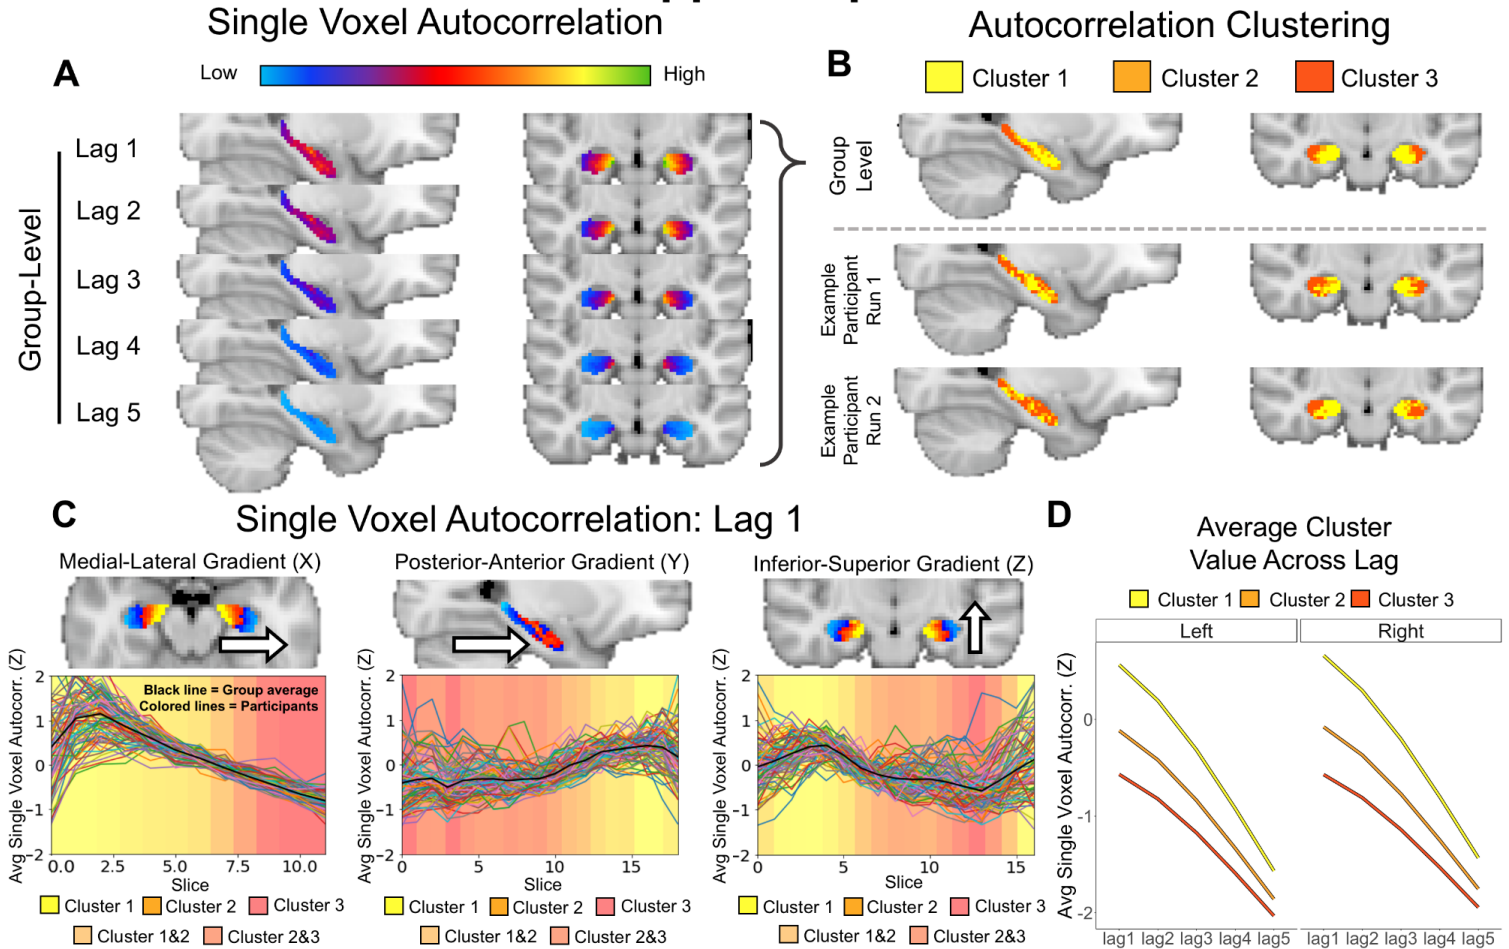

239 **Figure 2. Hippocampus. Single Voxel Autocorrelation.** **A)** Group-level single voxel  
 240 autocorrelation maps averaged across all runs for all participants. **Autocorrelation**  
 241 **Clustering.** **B)** Group-level clusters (top) and run-level cluster maps for two runs from an  
 242 example participant (bottom). Three distinct clusters were found at both the group and  
 243 the individual run-level. Cluster 1 was located in the anterior-medial hippocampus,  
 244 Cluster 3 was located in the posterior-lateral hippocampus, and Cluster 2 was located  
 245 between Cluster 1 and 3. **C) Single Voxel Autocorrelation: Lag 1.** Single voxel  
 246 autocorrelation (lag 1) averaged per slice and projected into three axes (X, Y, and Z) to  
 247 visualize changes in medial-lateral, anterior-posterior, and inferior-superior directions  
 248 (plots depict left hemisphere; right hemisphere looked similar). The average cluster  
 249 assignment of voxels on each slice is presented as the background color to show the  
 250 gradation in values along the three axes. **D) Average Cluster Value Across Lag.**  
 251 Average group-level single voxel autocorrelation values for each cluster at each lag.  
 252 Cluster 1 was associated with the highest single voxel autocorrelation values, Cluster 2  
 253 with intermediate values, and Cluster 3 with the lowest. This was consistent across all 5  
 254 lags.  
 255

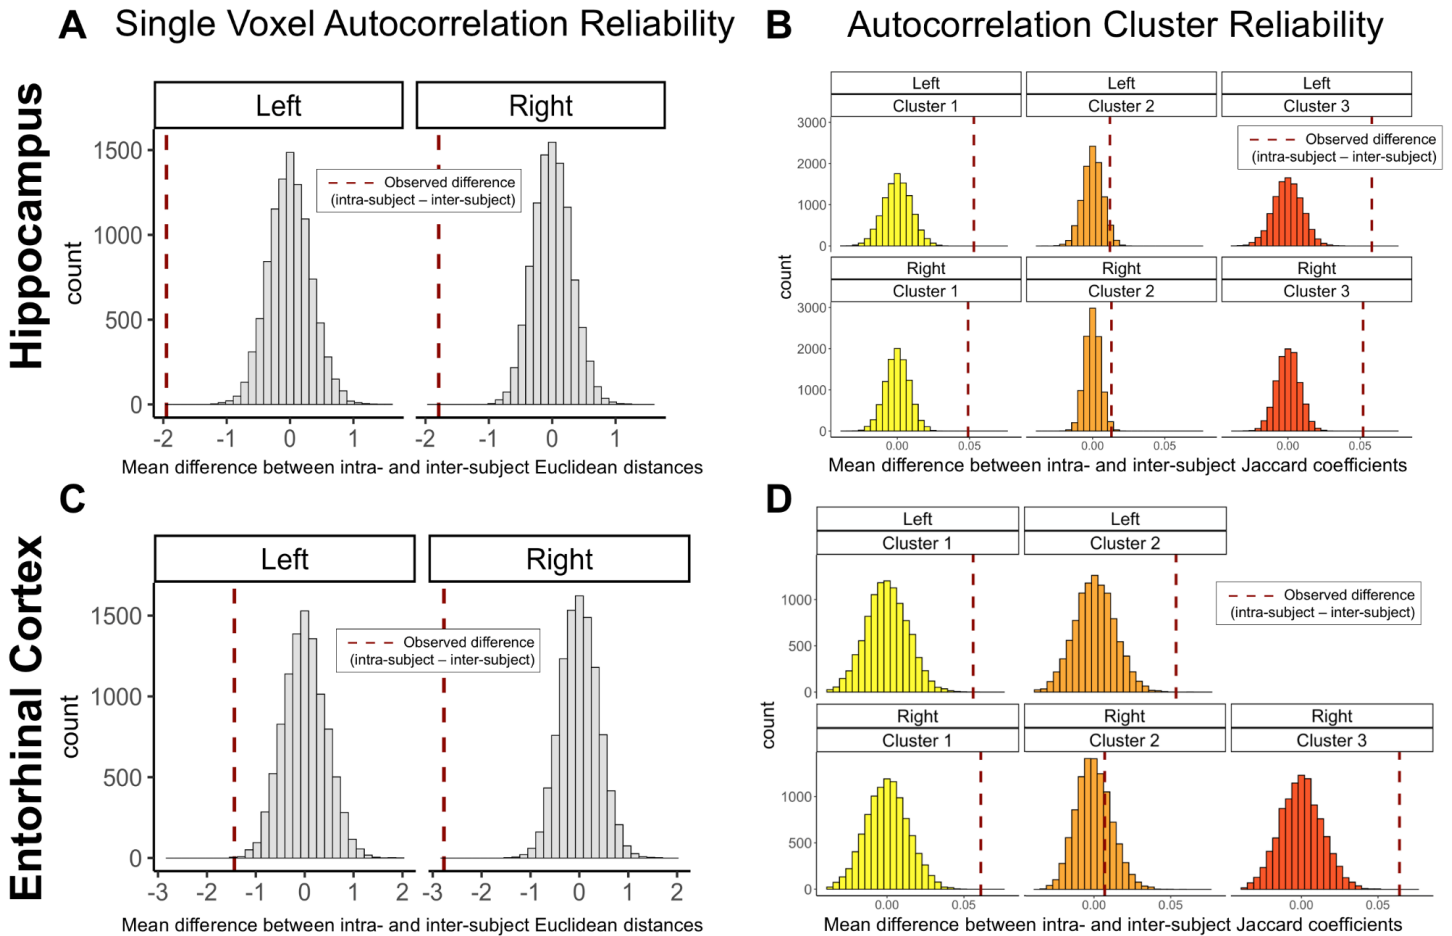

257 **Figure 3. Hippocampal and Entorhinal cortex reliability measures. A,C) Single**  
 258 **Voxel Autocorrelation Reliability.** Distribution of shuffled and permuted mean  
 259 difference of intra- and inter-subject Euclidean distances for the (A) hippocampus and  
 260 (C) entorhinal cortex. Dashed lines represent the observed mean difference between  
 261 intra- and inter-subject Euclidean distance. Significant negative values indicate that  
 262 single voxel autocorrelation values were more similar within an individual than across  
 263 individuals. **B, D) Autocorrelation Cluster Reliability.** Distribution of shuffled and  
 264 permuted mean difference of intra- and inter-subject Jaccard coefficients for each  
 265 cluster. Dashed lines represent the observed difference between intra- and inter-subject  
 266 Jaccard coefficients for each cluster. (B) In both hemispheres of the hippocampus,  
 267 Clusters 1 and 3 were more reliable within individuals compared to Cluster 2. (D) In the  
 268 entorhinal cortex, Cluster 1 and Cluster 2 were reliable within individuals in the left  
 269 hemisphere, whereas Cluster 1 and 3 were reliable within individuals in the right  
 270 hemisphere.

271  
 272  
 273  
 274  
 275

276 **Entorhinal cortex**

277 ***Spatial distribution of single voxel autocorrelation***

278 We repeated the analyses above in the ERC. To illustrate the distribution of  
279 autocorrelation values of individual voxels throughout the ERC, we plotted the  
280 group-level single voxel autocorrelation maps for lags 1-5 (Figure 4A). The maps  
281 illustrate a difference in single voxel autocorrelation throughout the ERC.  
282 Specifically, voxels with higher single voxel autocorrelation were mainly in the  
283 posterior-medial region whereas voxels with lower single voxel autocorrelation  
284 were mainly in the anterior-lateral region (in both left and right ERC).

285

286 ***Single voxel autocorrelation – Reliability results***

287 Nonparametric permutation tests comparing intra-subject and inter-subject  
288 Euclidean distance revealed reliable results in both the left (intra-subject:  $11.43 \pm$   
289  $3.64$ , inter-subject:  $12.87 \pm 2.83$ ,  $P < 0.001$  and right ERC (intra-subject:  $10.41 \pm$   
290  $2.63$ , inter-subject:  $13.19 \pm 2.53$ ,  $P < 0.001$ ; Figure 3C). This analysis  
291 demonstrates the reliability of the single voxel autocorrelation and suggests that  
292 single voxel autocorrelation patterns between vectors generated from two runs of  
293 the *same* participant were more similar than two runs from *different* participants  
294 (lower intra-subject Euclidean distances compared to inter-subject Euclidean  
295 distances).

296

297 ***Autocorrelation Clustering***

298 The group-level clustering analysis on the voxels within the ERC revealed two  
299 distinct clusters in the left hemisphere and three clusters in the right (Figure 4B).  
300 For comparison, cluster maps from two runs of an example participant are shown  
301 in Figure 4B. Cluster 1 was located in the posteromedial ERC and had the  
302 highest single voxel autocorrelation values in both left and right hemispheres.  
303 Cluster 2 was observed in the left hemisphere and was located towards the  
304 anterior-lateral ERC with low single voxel autocorrelation values. In the right  
305 hemisphere it was an intermediate cluster. Cluster 3 was only observed  
306 consistently in the right hemisphere and was located in the anterior-lateral ERC  
307 with the lowest single voxel autocorrelation values. We computed the group-level  
308 single voxel autocorrelation for each cluster and plotted it across all 5 lags  
309 (Figure 4D). Across all 5 lags, Cluster 1 consistently had the highest single voxel  
310 autocorrelation values, followed by Cluster 2 and Cluster 3.

311

312 ***Autocorrelation Clustering – Reliability results***

313 The reliability measure for ERC clusters was calculated by the Jaccard  
314 coefficient (Figure 3D). Nonparametric permutation tests comparing intra-subject  
315 and inter-subject cluster overlap revealed reliable results in the left and right

316 hemisphere. In the left hemisphere, the Cluster 1 ( $P < 0.001$ ) and Cluster 2 ( $P <$   
317  $0.001$ ) were reliable. In the right hemisphere, Cluster 1 ( $P < 0.001$ ) and Cluster 3  
318 ( $P < 0.001$ ) were reliable. This suggests that these clusters were highly reliable  
319 within individuals. In the right hemisphere, Cluster 2 had very small Jaccard  
320 values, suggesting less reliability within individuals (Right:  $P = 0.53$ ).

321

### 322 ***Gradients of single voxel autocorrelation (lag 1)***

323 Single voxel autocorrelation values for lag 1 were projected onto X (medial-  
324 lateral), Y (posterior-anterior), and Z (inferior-superior) axes. As shown in Figure  
325 4C, in every participant, single voxel autocorrelation values gradually decreased  
326 in the medial-to-lateral direction and the posterior-to-anterior direction (Figure  
327 4C). We found a gradient of low-to-high autocorrelation along the inferior-  
328 superior axis, which is due to the fact that the posterior region of the ERC is more  
329 superior than its anterior region. We observed a gradient of cluster assignment  
330 that complemented the single voxel autocorrelation gradients, where high-to-low  
331 gradients were also associated with a cluster gradient from Cluster1 to Cluster 2.

332

## Entorhinal Cortex

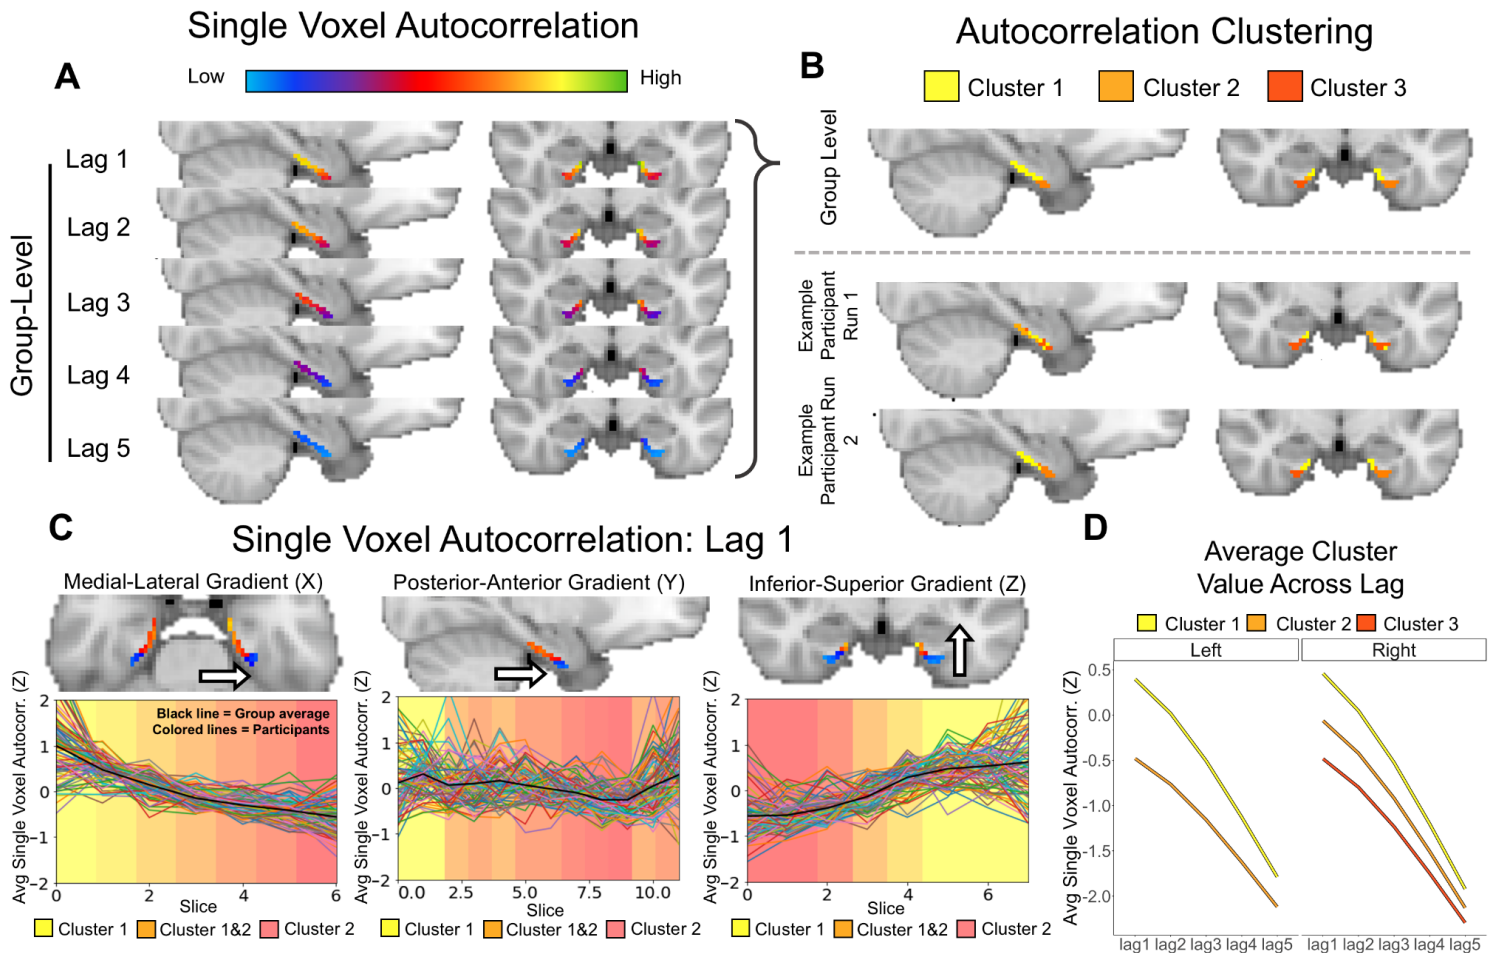

334 **Figure 4. Entorhinal cortex. Single Voxel Autocorrelation. A)** Group-level single  
 335 voxel autocorrelation maps averaged across all runs for all participants. **Autocorrelation**  
 336 **Clustering. B)** Group-level clusters (top) and run-level cluster maps for two runs from an  
 337 example participant (bottom). Two distinct clusters were found in the left hemisphere and  
 338 three in the right hemisphere. In the left hemisphere, Cluster 1 was located in the  
 339 posterior-medial ERC and Cluster 2 was in the anterior-lateral ERC. In the right  
 340 hemisphere Cluster 1 was located in the posterior-medial ERC, Cluster 3 was located in  
 341 the anterior-lateral ERC, and Cluster 2 was located between Cluster 1 and 3. **C) Single**  
 342 **Voxel Autocorrelation: Lag 1.** Single voxel autocorrelation projected below onto three  
 343 axes (X, Y, and Z) to visualize changes in medial-lateral, anterior-posterior, and inferior-  
 344 superior directions (for the left hemisphere; right hemisphere looked similar). The  
 345 average cluster assignment of voxels on each slice is presented as the background color  
 346 to show the gradation in values along the three axes (Note the gradation depicts only  
 347 Cluster 1 and 2 as there were only two significant clusters found in the left hemisphere).  
 348 **D) Average Cluster Value Across Lag.** Average group-level single voxel  
 349 autocorrelation values for each cluster at each lag. In the left hemisphere, Cluster 1 was  
 350 associated with the highest single voxel autocorrelation values and Cluster 2 with low  
 351 autocorrelation values. In the right hemisphere, Cluster 1 was associated with the

352 highest single voxel autocorrelation, Cluster 2 with intermediate values, and Cluster 3  
353 with the lowest. This was consistent across all 5 lags.

354

### 355 **Dataset 2: Navigation fMRI**

356 We next aimed to replicate the observed effects in task fMRI and relate changes  
357 in single voxel autocorrelation to behavior. Specifically, we were interested in  
358 how single voxel autocorrelation throughout the hippocampal long axis might be  
359 modulated by differences in difficulty during a temporally-extended navigation  
360 task. Therefore, we performed our single voxel autocorrelation analyses on a  
361 task fMRI dataset acquired while participants navigated in a familiar virtual reality  
362 environment (previously described in Brunec, Bellana et al., 2018). Here, 19  
363 participants were scanned while navigating Google Street View routes around  
364 the city of Toronto. Participants navigated four different types of routes that  
365 varied in their navigational difficulty: GPS (unfamiliar routes guided by an arrow),  
366 Familiar (highly familiar routes), Unfamiliar (routes that were less familiar), and  
367 Mirrored (familiar routes that were left-right reversed). Participants completed  
368 four unique routes in each condition, sixteen routes in total (1 route = 1 scanned  
369 run). Due to the lower spatial resolution in this dataset we were not able to  
370 examine the ERC and, thus, these analyses focused only on the hippocampus.

371

### 372 **Hippocampus**

#### 373 ***Spatial distribution of single voxel autocorrelation***

374 To compute the single voxel autocorrelation, we completed the same procedure  
375 outlined in Dataset 1. In Dataset 2 the TR was 2000 ms; therefore, single voxel  
376 autocorrelation for 2 lags (or 2 TRs) was calculated. We observed a difference in  
377 single voxel autocorrelation along the anterior-posterior and medial-lateral  
378 hippocampal axes, where voxels with higher single voxel autocorrelation were  
379 found in the anterior-medial hippocampus and voxels with lower single voxel  
380 autocorrelation were found in the posterior-lateral hippocampus. Figure 5A  
381 shows the group-level single voxel autocorrelation maps for the four navigation  
382 conditions (as single voxel autocorrelation maps for lags 1-2 were similar, only  
383 lag 1 is depicted in Figure 5A). The spatial distribution of single voxel  
384 autocorrelation was similar across navigation conditions and was also similar to  
385 the findings from Dataset 1. In the next section, we investigate the differences  
386 between conditions in more depth.



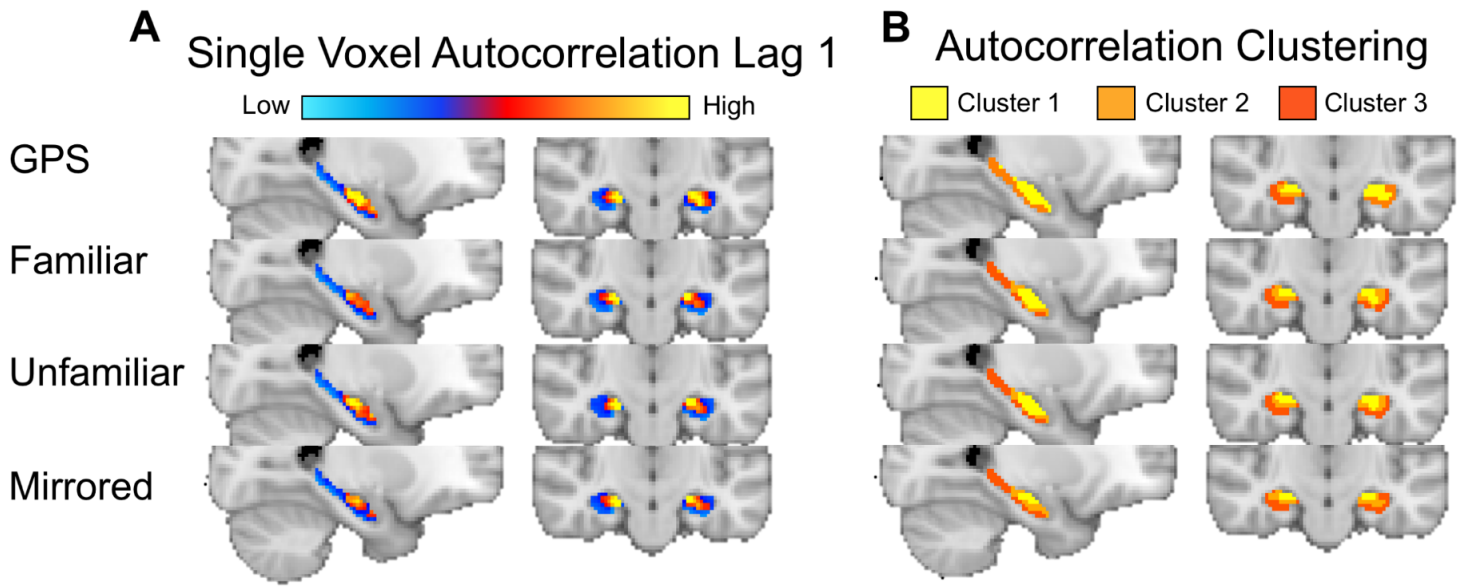

388 **Figure 5. A) Single Voxel Autocorrelation: Lag 1.** Single voxel autocorrelation values  
389 at lag 1 for every voxel in the hippocampus during spatial navigation. These values are  
390 averaged across run and participant for each of the GPS, Familiar, Unfamiliar and  
391 Mirrored conditions. A gradient from high to low autocorrelation is observed in the  
392 anterior-posterior and medial-lateral axes, across all navigation conditions. **B)**  
393 **Autocorrelation Clustering.** Cluster maps averaged across run and participant for each  
394 route type. High single voxel autocorrelation voxels cluster in the anterior-medial  
395 hippocampus and low single voxel autocorrelation voxels cluster in the posterior-lateral  
396 hippocampus.

397

#### 398 **Autocorrelation Clustering**

399 In order to determine clusters of single voxel autocorrelation within each  
400 navigational condition, we repeated the autocorrelation clustering procedure  
401 described above in Dataset 1 within the hippocampus. As with Dataset 1, this  
402 revealed three distinct clusters in the left and right hemispheres for the Familiar,  
403 Unfamiliar and Mirrored conditions (Figure 5B). For Familiar, Unfamiliar, and  
404 Mirrored conditions, Cluster 1 was located in the anterior-medial HPC and had  
405 the highest single voxel autocorrelation. Cluster 3 was located in the posterior-  
406 lateral hippocampus and had the lowest single voxel autocorrelation. Cluster 2  
407 was located between Cluster 1 and 3 and had intermediate single voxel  
408 autocorrelation. The GPS condition had three clusters in the right hemisphere  
409 and only two in the left.

410

#### 411 **Relating single voxel autocorrelation to navigation condition**

412 Subjective difficulty ratings collected after each route (1 = difficult, 9 = easy)  
413 suggested that across the navigation conditions, navigational difficulty increased.  
414 Participants rated the GPS routes as the easiest ( $M = 7.2$ ,  $SD = 1.46$ ), followed

415 by the Familiar condition ( $M = 6.98$ ,  $SD = 2.05$ ), Unfamiliar condition ( $M = 4.35$ ,  
416  $SD = 2.66$ ), and the Mirrored condition, which was subjectively the most difficult  
417 ( $M = 3.97$ ,  $SD = 2.42$ ).

418

419 As navigation becomes more difficult, it is beneficial to integrate or maintain  
420 information over time, which may be reflected in changes in single voxel  
421 autocorrelation. Specifically, more stable neural dynamics might enable  
422 individuals to maintain information as one moves towards a goal. This prediction  
423 leads to two possibilities. In the first, as navigational difficulty increases we might  
424 observe a uniform change in single voxel autocorrelation across all voxels in the  
425 hippocampus. A second possibility is that as difficulty increases, voxels that tend  
426 to exhibit high autocorrelation during rest would differentially increase their  
427 autocorrelation relative to voxels that tend to exhibit low autocorrelation. To  
428 investigate these possibilities, we calculated the slope of the single voxel  
429 autocorrelation (lag 1) along the anterior-posterior and medial-lateral axes. If  
430 navigational difficulty leads to a uniform increase in autocorrelation, we would  
431 observe no changes in the slope across these axes. However, if navigational  
432 difficulty disproportionately affects the regions of the hippocampus that show high  
433 autocorrelation during rest (Figure 2), then more difficult routes would elicit a  
434 larger difference in autocorrelation values along the anterior-posterior and  
435 medial-lateral axes, and therefore, a steeper slope. For easier routes, there  
436 would be less difference in autocorrelation along the two axes, suggesting more  
437 homogeneity of temporal dynamics along the axis and a shallower slope of  
438 autocorrelation.

439

#### 440 **Anterior-posterior HPC axis**

##### 441 *Comparing single voxel autocorrelation slopes*

442 We compared autocorrelation slopes in the four route conditions: GPS, Familiar,  
443 Unfamiliar, and Mirrored. For each participant, we averaged the single voxel  
444 autocorrelation (lag 1) across all voxels on each 3mm slice of the hippocampus  
445 (posterior-to-anterior direction) and calculated the slope coefficient across slices.  
446 In both the left and right hemisphere, across all four navigation conditions, the  
447 slope was positive, suggesting lower autocorrelation in the posterior  
448 hippocampus and higher autocorrelation in the anterior hippocampus, which is  
449 consistent with our findings from the clustering and single voxel autocorrelation  
450 lag 1 analyses. Across participants, Mirrored runs had steepest slopes (*Left*:  $M =$   
451  $0.79$ ,  $SD = 0.60$ ; *Right*:  $M = 0.55$ ,  $SD = 0.80$ ) followed by Unfamiliar (*Left*:  $M =$   
452  $0.69$ ,  $SD = 0.53$ ; *Right*:  $M = 0.41$ ,  $SD = 0.40$ ), Familiar (*Left*:  $M = 0.63$ ,  $SD = 0.46$ ;  
453 *Right*:  $M = 0.31$ ,  $SD = 0.25$ ), and GPS routes (*Left*:  $M = 0.53$ ,  $SD = 0.42$ ; *Right*:  $M$   
454  $= 0.21$ ,  $SD = 0.28$ ).

455

456 To test whether there was a significant difference between single voxel  
457 autocorrelation during different navigation conditions, we ran a mixed effects  
458 model on the single voxel autocorrelation slopes along the anterior-posterior axis.  
459 We included hemisphere and condition (GPS, Familiar, Unfamiliar, and Mirrored)  
460 as predictors in the model and participants as a random intercept in the random  
461 effects term. We found a significant effect of hemisphere ( $F(1, 481.99) = 42.22$ ,  $p$   
462  $< .001$ ) and a significant effect of navigation condition ( $F(3, 483.04) = 6.92$ ,  $p$   
463  $< .001$ ) (Figure 6A). Their interaction was not significant.

464

465 A post hoc analysis of the main effect of hemisphere revealed that the single  
466 voxel autocorrelation slope was greater in the left hippocampus compared to the  
467 right hippocampus ( $t(482) = 6.49$ ,  $p < .001$ ). Pairwise comparisons of the different  
468 navigational conditions (collapsed across hemisphere) revealed that single voxel  
469 autocorrelation slopes were significantly greater for the Mirrored compared to  
470 GPS ( $t(484) = 3.88$ ,  $p < .001$ ) and Familiar ( $t(482) = 3.71$ ,  $p < .01$ ). There was no  
471 significant difference between Mirrored and Unfamiliar conditions. These results  
472 suggest that, across hemispheres, the single voxel autocorrelation slopes along  
473 the anterior-posterior axis were modulated by navigation difficulty: navigation  
474 runs with a steeper gradient of autocorrelation were related to more difficult  
475 navigation conditions. We compared the average single voxel autocorrelation at  
476 the two posterior-most and two anterior-most slices and found that single voxel  
477 autocorrelation was higher in the anterior hippocampus compared to the  
478 posterior hippocampus in both the left and right hemisphere (Left: anterior  $>$   
479 posterior  $t(1998) = 22.23$ ,  $p < .001$ ; Right: anterior  $>$  posterior  $t(1998) = 13.49$ ,  $p$   
480  $< .001$ ). This finding suggests that increases in the autocorrelation slope along  
481 the anterior-posterior axis across conditions were driven by an increase in the  
482 anterior hippocampus.

483

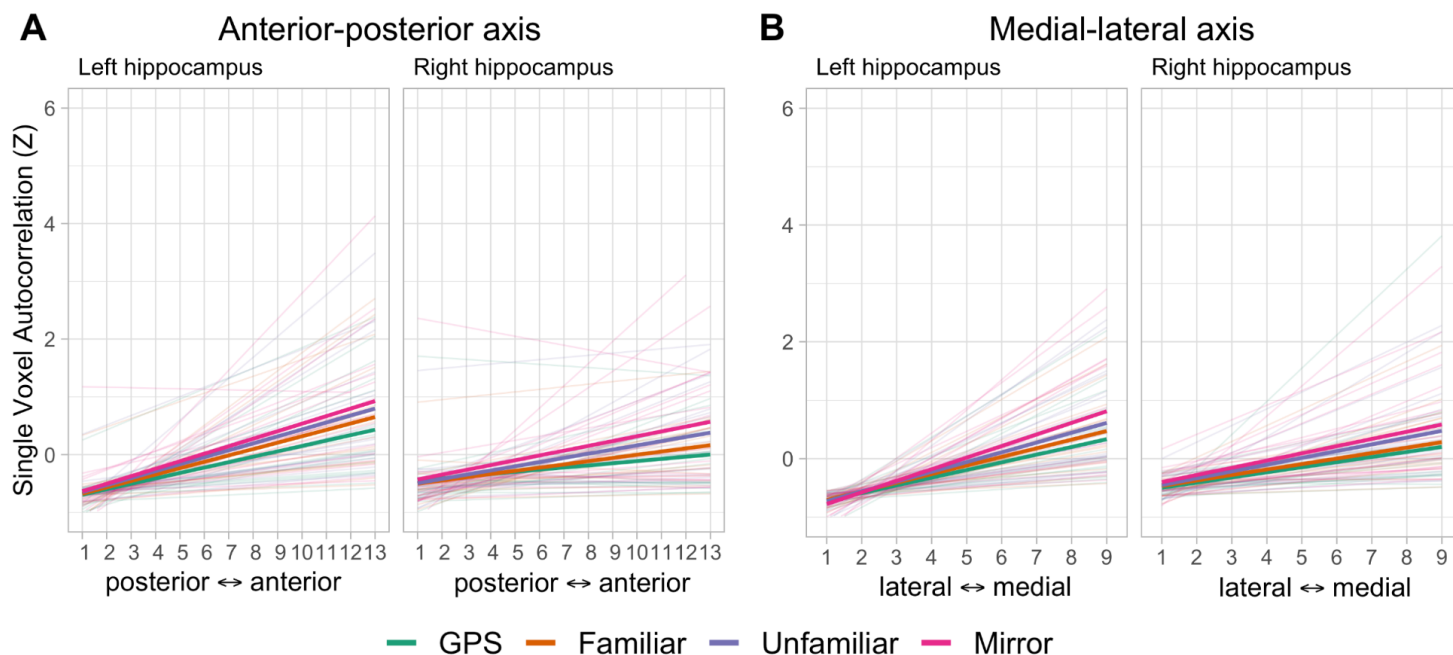

485 **Figure 5. Effect of navigational condition on single voxel autocorrelation slopes.**  
 486 Average single voxel autocorrelation per slice along the anterior-posterior and medial-  
 487 lateral axes for each navigation condition. **A) Anterior-posterior axis.** The left  
 488 hippocampus had greater single voxel autocorrelation slopes compared to the right  
 489 hippocampus. Across both hemispheres, slope along the anterior-posterior axis was  
 490 modulated by navigational condition. The slope was greatest when participants  
 491 navigated difficult routes (Mirrored and Unfamiliar routes) compared to easy routes (GPS  
 492 and Familiar routes) **B) Medial-lateral axis.** The left hippocampus had greater single  
 493 voxel autocorrelation slopes compared to the right hippocampus. Across both  
 494 hemispheres, slope along the medial-lateral axis was modulated by navigational  
 495 condition. The slope was greatest when participants navigated Mirrored routes  
 496 compared to GPS, Familiar, and Unfamiliar routes. Bold lines represent the group  
 497 average across all participants, faded lines represent each participant.

#### 498 **Medial-lateral HPC axis**

##### 499 *Comparing single voxel autocorrelation slopes*

500 For each participant, we averaged the single voxel autocorrelation (lag 1) across  
 501 all voxels on each 3mm slice of the hippocampus (lateral-to-medial direction) and  
 502 calculated the slope coefficient across slices. In both the left and right  
 503 hemisphere, across all four navigation conditions, the slope was positive,  
 504 suggesting lower autocorrelation in the lateral hippocampus and higher  
 505 autocorrelation in the medial hippocampus. This observation is consistent with  
 506 our findings from the clustering and single voxel autocorrelation lag 1 analyses.  
 507 Across participants, Mirrored runs had steepest slopes (*Left*:  $M = 1.63$ ,  $SD =$   
 508  $1.15$ ; *Right*:  $M = 1.45$ ,  $SD = 1.77$ ) followed by Unfamiliar (*Left*:  $M = 1.37$ ,  $SD =$   
 509  $1.15$ ; *Right*:  $M = 1.45$ ,  $SD = 1.77$ )

510 0.95; *Right*:  $M = 1.13$ ,  $SD = 1.20$ ), Familiar (*Left*:  $M = 1.21$ ,  $SD = 0.74$ ; *Right*:  $M =$   
511  $0.92$ ,  $SD = 0.98$ ), and GPS routes (*Left*:  $M = 1.08$ ,  $SD = 0.80$ ; *Right*:  $M = 0.89$ ,  $SD$   
512  $= 1.45$ ).

513

514 We ran a mixed effects model on the single voxel autocorrelation slopes along  
515 the medial-lateral axis with hemisphere and condition as predictors and  
516 participant as a random intercept in the random effects term. We found a  
517 significant effect of hemisphere ( $F(1, 482.03) = 5.03$ ,  $p < .05$ ) and a significant  
518 effect of navigation condition ( $F(3, 482.71) = 7.10$ ,  $p < .001$ ) (Figure 6B). Their  
519 interaction was not significant.

520

521 A post hoc analysis of the main effect of hemisphere revealed that the single  
522 voxel autocorrelation slopes were greater in the left than the right hippocampus  
523 ( $t(482) = 2.24$ ,  $p < 0.05$ ). Pairwise comparisons of the different navigational  
524 conditions (collapsed across hemisphere) revealed that single voxel  
525 autocorrelation slopes were significantly greater for the Mirrored compared to  
526 GPS ( $t(483) = 3.42$ ,  $p < .01$ ), greater for Mirrored compared to Familiar ( $t(482) =$   
527  $4.18$ ,  $p < .001$ ), and greater for Mirrored compared to Unfamiliar ( $t(482) = 2.61$ ,  $p$   
528  $< .05$ ). These results suggest that, across hemispheres, the single voxel  
529 autocorrelation slopes along the medial-lateral axis were modulated by  
530 navigation difficulty: navigation runs that had a steeper gradient of  
531 autocorrelation were related to more difficult navigation conditions. We compared  
532 the average single voxel autocorrelation at the two medial-most and two lateral-  
533 most slices and found that single voxel autocorrelation was higher in the medial  
534 hippocampus than the lateral hippocampus in both the left and right hemisphere  
535 (*Left*: medial > lateral  $t(1998) = 17.76$ ,  $p < .001$ ; *Right*: medial > lateral  $t(1998) =$   
536  $14.91$ ,  $p < .001$ ). This suggests that increases in the autocorrelation slope along  
537 the medial-lateral axis across conditions is driven by an increase in the medial  
538 hippocampus.

539

## 540 **Discussion**

541

542 Here we present a novel autocorrelation measure to investigate intra-  
543 hippocampal and intra-entorhinal processing. We provide the first evidence of a  
544 medial-lateral gradient of autocorrelation in the hippocampus, as well as a  
545 posterior-medial and anterior-lateral gradient in the ERC. We found that voxels in  
546 the anterior-medial hippocampus have a highly correlated, slower changing  
547 signal, whereas voxels in the posterior-lateral hippocampus have a less  
548 correlated, faster changing signal (Figure 2) (Brunec, Bellana, et al., 2018; Raut  
549 et al., 2020). Our study highlights the importance of examining the medial-lateral

550 axis of the hippocampus, which has previously been an under-studied feature of  
551 hippocampal organization. We find novel evidence for a continuous gradient in  
552 the ERC, with greater autocorrelation in the posteromedial ERC and lower  
553 autocorrelation in the anterolateral ERC (Figure 4). Lastly, the present study is  
554 the first to show that gradients of single voxel autocorrelation in the hippocampus  
555 are related to behavior during navigation. Specifically, autocorrelation gradients  
556 in the anterior-posterior and medial-lateral axes, as measured by the slope,  
557 increased for difficult routes and were steepest in the left hemisphere (Figure 6).  
558 This increase in slope was driven by increases in the anterior-medial  
559 hippocampus.

560  
561 Our data-driven approach — which allows voxels to cluster according to their  
562 single voxel autocorrelation, uncovered a multidimensional gradient in both the  
563 anterior-posterior and medial-lateral axes in both the hippocampus and ERC  
564 (Figure 2 & 4). In the hippocampus, the anterior-posterior axis has been studied  
565 with respect to its role in representing graded information, for example coarse-  
566 grained to fine-grained information (Poppenk et al. 2013; Strange et al., 2014),  
567 large to small spatial distances (Evensmoen et al., 2013; Nielson et al., 2015;  
568 Peer et al., 2019;) and long to short temporal distance (Bellmund et al., 2019;  
569 Nielson et al., 2015). Investigations of representational differences along the  
570 medial-lateral axis, however, have been limited because prior work has used  
571 predefined anatomical segmentations limited to the anterior and posterior  
572 portions of the long axis of the hippocampus. Our single voxel autocorrelation  
573 method is not restricted by predefined ROIs and proves to be a more precise  
574 measure that detects subtle differences in signal along the medial-lateral axis  
575 that have been previously overlooked and that are modulated by navigational  
576 difficulty. In addition to the hippocampus, we found similar distinctions in the  
577 ERC. We observed a gradient of single voxel autocorrelation organization, such  
578 that greater single voxel autocorrelation was observed in the posterior-medial  
579 region and lower single voxel autocorrelation in the anterolateral region of the  
580 ERC (Figure 4). This gradient is consistent with previous neuroimaging  
581 investigations of ERC which used high-resolution fMRI and functional  
582 connectivity to define distinct subregions within the human ERC (Maass et al.,  
583 2015; Navarro Schröder et al., 2015). Our analytic technique, however, goes  
584 beyond this prior work by demonstrating, for the first time, continuous gradients  
585 of autocorrelation in the ERC.

586  
587 The present study demonstrates that the autocorrelation of the fMRI signal is not  
588 just global noise, but instead carries meaningful information about brain function  
589 that is directly related to behavior. Autocorrelation is frequently characterized as

590 noise that masks meaningful signals and is unrelated to cognition, but recent  
591 research suggests that autocorrelation might be a global organizing principle and  
592 reflects intrinsic functional hierarchies in the brain (Irish & Vatansever, 2020;  
593 Raut et al., 2020). For example, an analysis of resting state fMRI data calculated  
594 the autocorrelation decay in single voxels across a temporal window (0-8  
595 seconds) and found a significant large-to-small timescale gradient along the  
596 anterior-posterior axis in the hippocampus (Raut et al., 2020), which is consistent  
597 with reports by Brunec, Bellana, et al. (2018). Recent research has also linked  
598 autocorrelation with global differences in cognitive state (task vs. rest) and  
599 mental state (healthy vs. schizophrenia) (Arbabshirani et al., 2019). While this  
600 study cannot address the direct link between the autocorrelation gradients and  
601 behavior, this work suggests that autocorrelation can be used to discriminate  
602 between cognitive states that are uniform across the brain, leaving open the  
603 question of how autocorrelation gradients in specific brain regions might be  
604 related to differences in cognition during a behavioral task. Our analysis  
605 technique demonstrated novel gradients during resting state, and can also be  
606 applied to task related activation to reveal their relation to on-going behavior and  
607 is the first to show that changes in single voxel autocorrelation gradients are  
608 directly related to changes in difficulty during a navigation task.

609  
610 Anterior hippocampal voxels are more stable across time compared to the  
611 posterior hippocampus, which might enable the anterior hippocampus to maintain  
612 prior information across time during goal-directed navigation (Brunec, Bellana, et  
613 al., 2018). Our method proved to be a more sensitive measure than previous  
614 techniques (e.g., Brunec, Bellana et al., 2018) because we were able to show  
615 differences in autocorrelation across navigation conditions. More specifically we  
616 found that the autocorrelation in the anterior-medial hippocampus increased  
617 during navigation of difficult routes (Figure 6). The autocorrelation signal may  
618 reflect the mechanism by which the hippocampus holds onto the past and carries  
619 it forward during navigation when we are in unfamiliar or unpredictable  
620 environments. For example, when navigating an unfamiliar route to a distant  
621 goal, the local details of the environment might not be helpful to orient oneself in  
622 relation to the goal; it may be more efficient, therefore, to keep in mind a coarser,  
623 overall map of the environment with information about steps already taken in  
624 order to reach the goal destination successfully. This large-scale representation  
625 may not be as useful to keep online during navigation of well-known or familiar  
626 routes where local details are sufficient for orienting and navigating to the goal,  
627 which could explain the decreased single voxel autocorrelation in the signal  
628 throughout the familiar routes (Figure 6). This hypothesis is supported by  
629 previous research which has shown that the anterior hippocampus plays an

630 important role in representing larger spatial and temporal distances (Evensmoen  
631 et al., 2013; Nielson et al., 2015) as well as representing coarser-grained, global  
632 representations (Collin et al., 2015).

633

634 We found that both of the single voxel autocorrelation gradients (anterior-  
635 posterior and medial-lateral) were steeper in the left hemisphere compared to the  
636 right. It is still unclear whether this is representative of a stable difference in  
637 autocorrelation between the hemispheres or whether this reflects different types  
638 of information that are engaged across the two hemispheres during navigation.  
639 Future research is needed to determine the nature of this hemispheric difference.

640

641 Another non-mutually exclusive possibility is that the single voxel autocorrelation  
642 is representative of predictions that are cast into the future. The notion that  
643 increased temporal similarity is indicative of an extended spatiotemporal  
644 representation is supported by recent work investigating the predictive horizons  
645 along the hippocampal anteroposterior axis during navigation (Bruenc &  
646 Momennejad, 2019). Brunec and Momennejad (2019) found that as participants  
647 virtually navigated familiar, real-world routes (a subset of the familiar routes  
648 presented here), hippocampal activity was related to a hierarchical scale of  
649 horizon representations, in which the posterior hippocampus represented steps  
650 closer in the future trajectory (~25m) while the anterior hippocampus represented  
651 steps further in the future trajectory (~175m). It is possible, therefore, that the  
652 single voxel autocorrelation we observed helps represent an upcoming  
653 navigational trajectory, with immediate goals represented in posterior-lateral  
654 regions and more distal goals in the anterior-medial hippocampus. The predictive  
655 role of the hippocampus has also been observed in perception, particularly when  
656 the stimulus was visually complex (Kok et al., 2020). Our method and findings  
657 open the door for future studies using high resolution neuroimaging in  
658 combination with a task that parametrically modulates the amount of information  
659 that is carried over time in both predictable (familiar) and unpredictable  
660 (unfamiliar) environments to uncover content that is carried forward via the  
661 autocorrelation signal.

662

663 Although we were not able to relate the autocorrelation in ERC to behavior due to  
664 the resolution of the navigation data, if we apply the same logic we used for the  
665 hippocampus, our findings are consistent with the notion that aERC codes for  
666 local details and perceptual aspects of experience, whereas the pmERC codes  
667 for global contexts. Specifically, the (antero-)lateral ERC has been linked to fine-  
668 grained temporal processing (Montchal et al., 2019; Tsao et al., 2018) and to  
669 processing of object-context and within-object details (Yeung et al., 2017; 2019).



670 The low autocorrelation we observed in the aERC might indicate faster updating  
671 of moment-to-moment changes and therefore support fine-grained  
672 representations. Future investigations can use our method to analyze continuous  
673 changes along both anterior-posterior and medial-lateral axes of the ERC without  
674 being restricted to anatomical subfield segmentations, perhaps revealing a more  
675 nuanced understanding of the organization of the ERC. We observed two  
676 consistent clusters in the left hemisphere and three consistent clusters in the  
677 right hemisphere, which suggests that in this dataset there was more variability in  
678 the left ERC intermediate cluster. Future research is needed to determine  
679 whether this is a stable property of the temporal organization of the left ERC that  
680 can be replicated across other datasets.

681  
682 It is currently unclear how the posterior-medial and anterior-lateral subregions of  
683 the ERC are functionally related to the anterior and posterior regions of the  
684 hippocampus. In the present study we found that clusters in the anterior-medial  
685 hippocampus and posterior-medial ERC had high single voxel autocorrelation,  
686 whereas clusters in the posterior-lateral hippocampus and antero-lateral ERC  
687 had low single voxel autocorrelation. These distinctions along the anterior-  
688 posterior and medial-lateral axes of the ERC are consistent with previous  
689 functional connectivity findings (Navarro Schröder et al., 2015), however  
690 functional connectivity and neuroanatomical studies in humans have been limited  
691 and do not find any clear differences between the anterior and posterior portions  
692 of the hippocampus with respect to their connectivity to different subregions in  
693 the ERC (Maass et al., 2015; Navarro Schröder et al., 2015). Functional  
694 connections between these regions might be evident in the scale of information  
695 processing in the hippocampus and ERC. For example, it is possible that the  
696 pattern of low single voxel autocorrelation in anterior-lateral ERC and posterior-  
697 lateral hippocampus supports fine-grained processing — precise temporal  
698 processing in the anterior-lateral ERC (Bellmund et al., 2019; Montchal et al.,  
699 2019) and local spatial details in the posterior hippocampus (Doeller et al., 2008;  
700 Evensmoen et al., 2013; Hirshhorn et al. 2012; Lee et al., 2012).

701  
702 There are currently no clear neuroanatomical links between the anterior-lateral  
703 ERC and posterior-lateral hippocampus or the anterior-medial hippocampus and  
704 posterior-medial ERC. There are, however, probable connections between the  
705 anterior ERC and lateral hippocampus and posterior ERC with medial  
706 hippocampus (Strange et al., 2014; Witter & Amaral 2020; Nilssen et al., 2019;  
707 Witter et al., 2017). Our results, therefore, open the door for future investigations  
708 to characterize more fully the nature of anterior and posterior hippocampal signal  
709 dynamics in relation to the entorhinal subregions in humans and in relation to

710 other structures, such as prefrontal cortex (Barredo et al., 2015; Vaidya & Badre,  
711 2020).

712

713 The results presented here reveal, for the first time, two continuous gradients  
714 along the anterior-posterior and medial-lateral axes in the hippocampus and  
715 ERC. One outstanding question is whether there is new information that can be  
716 gained by investigating the two autocorrelation gradients separately, or whether  
717 the information they represent is redundant. For example, do tasks that evoke a  
718 steep autocorrelation gradient along the anterior-posterior axis necessarily evoke  
719 a similarly steep gradient along the medial-lateral axis or are there tasks in which  
720 these two gradients act in opposing directions (e.g., change in anterior-posterior  
721 slope but no change or change in opposite direction in medial-lateral slope).  
722 Another outstanding question is whether our novel single voxel autocorrelation  
723 method can be applied with shorter timescales so that they can be used with  
724 event-related designs. Here we use the entire timecourse of the voxel's activity to  
725 calculate the single voxel autocorrelation throughout the entire run, but it remains  
726 to be seen whether we can adapt our method to examine how autocorrelation  
727 changes over shorter time windows. This would allow us to ask new questions  
728 about what kind of information is being carried in the autocorrelation signal during  
729 discrete or shorter events and at event boundaries, which are known to trigger  
730 changes in hippocampal activity associated with integration of information across  
731 events (Dubrow & Davachi, 2013; Ezzyat & Davachi, 2014). Finally, this method  
732 can be used to investigate differences in autocorrelation within subfields of the  
733 hippocampus. For example, it has been proposed that CA1 is implicated in  
734 integrating information in memory, whereas DG/CA3 which mediates pattern  
735 separation may be more implicated in making fine distinctions in memory (Kyle et  
736 al., 2015; Leutgeb et al., 2004; Schapiro et al., 2017; Yassa & Stark, 2011).  
737 Integration processes in CA1, therefore, might be supported by voxels with high  
738 single voxel autocorrelation while separation processes in DG/CA3 might be  
739 better supported by low single voxel autocorrelation. Future research using our  
740 method and high-resolution fMRI is needed to test these differences within  
741 subfields.

742

743 Our studies were inspired initially by single-unit recording studies in rodents  
744 (Brun et al., 2008; Cavanagh et al., 2016; Gothard et al., 1996; Kjelstrup et al.,  
745 2008; Maurer et al., 2005). We believe our findings, however, have gone beyond  
746 replicating the rodent findings in humans, a worthy task in its own right, but  
747 extended the findings to the point that they can now be used to inform future  
748 studies in rodents and humans. We provide some examples in which this is the  
749 case. For example, our method enabled us to find differences in autocorrelation

750 along the anterior-posterior and medial-lateral axes in the entorhinal cortex,  
751 which have only been examined in a restricted region in rodents (Brun et al.,  
752 2008). Our findings are consistent with neuroanatomical and neurophysiological  
753 divisions in that structure (human: Maass et al., 2015; monkey: Witter & Amaral,  
754 2021; rat: Witter et al., 2017). Second, although activity of a single voxel,  
755 comprised of thousands of neurons, may be considered to be a coarser unit of  
756 analysis than recordings from single units, it may be the case that it is the  
757 operation of a population of these neurons that is most closely linked to  
758 organizational temporal dynamics. It is the gradients revealed by autocorrelation  
759 at the single voxel level that enabled us to link hippocampal dynamics to  
760 behavior. In addition, we were able to segment the populations into clusters,  
761 suggesting subdivisions that would not be evident at the single-unit level. It would  
762 be worthwhile to determine whether similar clusters are found in rodents and  
763 examine their functional significance. Similar analyses at the population-level in  
764 rodents may yield information about the relation of neural dynamics to higher-  
765 level memory representations and goals, an enterprise that is just beginning  
766 (Jacob & Josselyn, 2020; Morrissey et al., 2017).

767

768 Our results provide compelling evidence for a gradation of single voxel  
769 autocorrelation in the hippocampus and ERC. As predicted, our single voxel  
770 method proved to be a fine-grained measure that revealed subtleties in the  
771 spatial organization of autocorrelation, going beyond prior methods, and allowed  
772 us to observe graded signals along anterior-posterior and medial-lateral axes in  
773 both regions. Further, we show for the first time that differences in single voxel  
774 autocorrelation gradients in the hippocampus can be directly related to  
775 differences in difficulty during a virtual navigation task, thus opening the door for  
776 future research to ask new questions of the autocorrelation signal and uncover  
777 how it is related to behavior.

778

## 779 **Materials and Methods**

780

### 781 **Dataset 1: Resting state fMRI**

#### 782 ***Participants***

783 We analyzed resting state fMRI data from 44 participants (14 male) from the  
784 Human Connectome Project (HCP) Retest dataset. This dataset consists of data  
785 from 44 participants who were scanned twice using the full HCP imaging  
786 protocol. All subject recruitment procedures and informed consent forms,  
787 including consent to share de-identified data, were approved by the Washington  
788 University Institutional Review Board (IRB) (Glasser et al. 2016). The present  
789 analysis of this dataset was approved by the University of Toronto research

790 ethics board.

791

### 792 ***Scanning parameters and preprocessing***

793 Resting state data were collected using a multiband EPI pulse sequence (TR =  
794 720 ms, TE = 33.1 ms, 72 slices with 2 mm thickness, FOV = 208 x 180 mm,  
795 voxel size = 2x2 mm, Flip angle = 52, Multiband factor = 8, Scan time = 14  
796 minutes and 33 seconds). Each run was repeated twice, with a left-to-right and a  
797 right-to-left phase encoding direction. The presented results are generated from  
798 data with the left-to-right phase encoding direction.

799

800 Initial fMRI preprocessing steps already applied to the downloaded data included  
801 fieldmap correction, motion correction, brain extraction, registration to standard  
802 space, and intensity normalization (Glasser et al., 2013; Smith et al., 2013; Van  
803 Essen et al., 2013). The data were further preprocessed using the FIX tool in  
804 FSL (Griffanti et al., 2014; Salimi-Khorshidi et al., 2014), and noise components  
805 related to head motion and other artifacts were removed. To eliminate high  
806 frequency noise and artifacts, fMRI signals are low-pass filtered using MATLAB  
807 IIR Butterworth filter (designfilt function in Signal Processing Toolbox) with cutoff  
808 frequency of 0.1 Hz.

809

### 810 ***Single voxel autocorrelation method***

#### 811 *Computing single voxel autocorrelation*

812 Bilateral hippocampal and entorhinal masks were generated using the Harvard-  
813 Oxford Atlas in FSL. For each voxel inside each of the regions of interest (ROIs),  
814 unbiased autocorrelation (as implemented in MATLAB xcorr function) was  
815 calculated. Specifically, the timecourse of a single voxel's activity was correlated  
816 with itself shifted by a temporal lag, the length of 1 TR (Dataset 1 TR = 720 ms).  
817 We repeated this process, shifting the timecourse forward by 1 lag (720 ms) and  
818 correlating it with the original, non-shifted timecourse until a maximum temporal  
819 shift of 4 seconds was reached. We chose 4 seconds because it has been shown  
820 that the autocorrelation of the fMRI signal in the gray matter drops off after 4  
821 seconds (i.e., it is not distinguishable from the autocorrelation of other noise)  
822 (Bollmann et al., 2018). For example, the non-shifted timecourse was correlated  
823 with lag 1 (length of 1 TR), lag2 (length of 2 TRs), etc. (Figure 1). The  
824 autocorrelation (AC) computed for each lag was stored in a vector. The  
825 autocorrelation vector (single voxel autocorrelation vector) contained 5 values  
826 (one single voxel autocorrelation for each lag). This approach resulted in a single  
827 voxel autocorrelation vector for each voxel (Figure 1A). All single voxel  
828 autocorrelation values were normalized by subtracting the mean and dividing by  
829 the standard deviation within each mask so that meaningful comparisons could

830 be made between the two fMRI datasets (resting state and task). Single voxel  
831 autocorrelation maps were then averaged across the first and second runs from  
832 the 44 participants to generate an average overall map (e.g., Figure 1B).

833

#### 834 *Single voxel autocorrelation – Reliability Analysis*

835 To verify that the observed single voxel autocorrelation pattern was not a  
836 measurement artifact (e.g., head motion, magnetic field inhomogeneity,  
837 physiological artifacts, etc.), we tested the reliability of the single voxel  
838 autocorrelation pattern within an individual. In our case, the single voxel  
839 autocorrelation pattern was deemed reliable if there was a high degree of  
840 agreement between the single voxel autocorrelation values generated from  
841 different runs from the same participant compared to runs from different  
842 participants. Reliability of the single voxel autocorrelation values was measured  
843 by calculating the Euclidean distance (ED) between the single voxel  
844 autocorrelation vectors for all pairs of run-wise datasets. 44 participants with 2  
845 repeated sessions produced 44 intra-subject and 3784 inter-subject ED values.  
846 The lower the ED between two single voxel autocorrelation vectors, the higher  
847 the similarity between them. We expected to see more similar single voxel  
848 autocorrelation patterns between single voxel autocorrelation vectors generated  
849 from two runs of the same participant compared to two runs from different  
850 participants (lower intra-subject ED compared to inter-subject ED). The inter-  
851 subject and intra-subject ED are not completely independent from one another,  
852 therefore we used nonparametric permutation to test for significance. We  
853 randomly shuffled the intra- and inter-subject labels and pulled two samples of  
854 size 44 (intra-subject) and 3784 (inter-subject). We calculated the mean  
855 difference between the two samples and repeated this process 10,000 times,  
856 resulting in a histogram of mean differences under the null hypothesis (i.e., the  
857 difference between intra- and inter-subject ED equal to zero). We compared the  
858 observed difference between intra- and inter-subject EDs with the null distribution  
859 and calculated nonparametric p-values. Permutation tests were conducted using  
860 a permutation testing package in Matlab (Laurens, 2021).

861

#### 862 *Computing single voxel autocorrelation clusters (Autocorrelation Clustering)*

863 The Euclidean distance between the single voxel autocorrelation vectors of each  
864 voxel pair in each mask was calculated to create a distance matrix. The distance  
865 matrix was first normalized (i.e., divided by the maximum value) and then  
866 subtracted from 1 to generate a similarity matrix ranging from 0 to 1. This  
867 similarity matrix was used to generate hippocampal clusters using the modularity  
868 optimization algorithm proposed by (Blondel et al., 2008; Wickramarachchi et  
869 al., 2014). Unlike the majority of the clustering methods, modularity optimization

870 does not require to assign the number of clusters and estimates the optimum  
871 number of clusters from data. In addition to clustering at the level of each  
872 individual, group-level clustering was performed by averaging the similarity  
873 matrices of all participants (e.g., Figure 1C).

874

#### 875 *Autocorrelation Clustering – Reliability Analysis*

876 Reliability of the clustering was measured by calculating the overlap between the  
877 generated clusters using the Jaccard coefficient. The Jaccard coefficient of  
878 regions A and B is defined as:

879

$$880 \quad J(A, B) = \frac{|A \cap B|}{|A \cup B|}$$

881

882 Where  $|A \cap B|$  is the number of common voxels in both A and B (intersection)  
883 and  $|A \cup B|$  is the number of voxels in A and B combined (union). Individual  
884 parcellations were then compared to the group-level parcellation to examine the  
885 consistency of parcellation. The Jaccard coefficient was calculated both intra-  
886 subject (overlap between clusters extracted from two runs from the  $n$ th subject)  
887 and inter-subject (overlap between the cluster from the  $n$ th subject and the same  
888 cluster estimated in all other subjects).

889

890 Assuming that the single voxel autocorrelation pattern is consistent across the  
891 two runs of the same participant, we expected there to be greater spatial overlap  
892 (higher Jaccard coefficient) among clusters within an individual compared to  
893 between different individuals. The Jaccard coefficients for clusters within  
894 participants are not completely independent from the Jaccard coefficients for  
895 clusters between participants, therefore we used nonparametric permutation to  
896 test for significance. For each cluster, we randomly shuffled the intra- and inter-  
897 subject labels and pulled two samples of size 44 (intra-subject) and 3784 (inter-  
898 subject). We calculated the mean difference between the two samples and  
899 repeated this process 10,000 times, resulting in a histogram of the mean  
900 differences under the null hypothesis (i.e., the difference between intra- and -  
901 inter-subject Jaccard coefficient equal to zero). We compared the observed  
902 difference between intra- and inter-subject Jaccard coefficients with the null  
903 distribution and calculated nonparametric P values.

904

#### 905 **Dataset 2: Navigation fMRI**

##### 906 *Participants*

907 Task fMRI data is from Brunec, Bellana, et al. (2018), where 19 participants (9  
908 males; mean age 22.58 years, range 19-30 years) were scanned while  
909 navigating Google Street View routes around the city of Toronto. All subject

910 recruitment procedures and informed consent was approved by the University of  
911 Toronto research ethics board.

912

### 913 ***Paradigm***

914 Participants met with the experimenter ahead of time and built routes that were  
915 either highly familiar or less familiar to them (e.g., frequently travelled or not).  
916 Participants then returned to the lab for their second session and were scanned  
917 while they navigated four different types of routes. 1) Familiar: participants  
918 started at a familiar landmark and navigated to a familiar goal destination via a  
919 familiar route, 2) Mirrored: participants started at a familiar landmark and  
920 travelled to a familiar destination via a familiar route, but the images of the route  
921 were mirrored (left-right reversed), 3) Unfamiliar: participants started at a familiar  
922 location, navigated to a familiar destination, but they were instructed to take an  
923 unfamiliar route between the two, and 4) GPS: participants started at an  
924 unfamiliar location in an unfamiliar part of town and pressed arrow keys following  
925 the directions displayed by an arrow on the screen to the goal destination.  
926 Participants completed four unique routes in each condition, sixteen routes in  
927 total (1 route = 1 scanned run). At the end of each route, participants rated the  
928 difficulty of the route on a scale from 1 (difficult) to 9 (easy).

929

### 930 ***Scanning parameters and preprocessing***

931 Participants were scanned with a 3T Siemens MRI scanner at Baycrest's Rotman  
932 Research Institute. A high-resolution 3D MPRAGE T1-weighted pulse sequence  
933 image (160 axial slices, 1 mm thick, FOV = 256 mm) was first obtained to register  
934 functional maps against brain anatomy. Functional imaging was performed to  
935 measure brain activation by means of the blood oxygenation level dependent  
936 (BOLD) effect. Functional T2\*-weighted images were acquired using echo-planar  
937 imaging (30 axial slices, 5 mm thick, TR = 2000 ms, TE = 30 ms, flip angle = 70  
938 degrees, FOV = 200 mm). The native EPI resolution was 64 x 64 with a voxel  
939 size of 3.5mm x 3.5mm x 5.0mm. Images were first corrected for head motion  
940 using the Analysis of Functional NeuroImages (AFNI; Cox, 1996). All subsequent  
941 analysis steps were conducted using the statistical parametric mapping software  
942 SPM12.

943

944 Preprocessing involved slice timing correction, spatial realignment and co-  
945 registration, with a resampled voxel size of 3mm isotropic, with no spatial  
946 smoothing. As all of our analyses rely on covariance, we additionally regressed  
947 out the mean time-courses from participant-specific white matter, and  
948 cerebrospinal fluid masks, alongside estimates of the 6 rigid body motion  
949 parameters from each EPI run. To further correct for the effects of motion which

950 may persist despite standard processing (Power et al., 2012), an additional  
951 motion scrubbing procedure was added to the end of our preprocessing pipeline.  
952 Using a conservative multivariate technique, time points that were outliers in both  
953 the six rigid-body motion parameter estimates and BOLD signal were removed,  
954 and outlying BOLD signal was replaced by interpolating across neighboring data  
955 points. Motion scrubbing further minimizes any effects of motion-induced spikes  
956 on the BOLD signal, over and beyond standard motion regression, without  
957 leaving sharp discontinuities due to the removal of outlier volumes (for details,  
958 see Campbell et al., 2013). To enable comparisons at the group-level, the final  
959 step of the preprocessing involved warping participants' functional data to the  
960 MNI-space template.

961

### 962 ***Single voxel autocorrelation method***

#### 963 *Computing single voxel autocorrelation*

964 To compute the single voxel autocorrelation, we completed the same procedure  
965 outlined in Dataset 1. We used the same bilateral hippocampal masks to extract  
966 the HPC voxels in Dataset 2. For each voxel, the single voxel autocorrelation  
967 was calculated by repeatedly shifting temporal lags (length of 1 TR) until a  
968 maximum lag of 4 seconds was reached. In Dataset 2 the TR was 2000 ms;  
969 therefore, single voxel autocorrelation for 2 lags (or 2 TRs) was calculated,  
970 resulting in a maximum lag of 4 seconds. As outlined in the procedure above,  
971 single voxel autocorrelation values were normalized by subtracting the mean and  
972 dividing by the standard deviation. Single voxel autocorrelation was calculated for  
973 all four runs of each navigational condition (Familiar, Unfamiliar, Mirrored, GPS).  
974 The single voxel autocorrelation was averaged across the four scanned runs  
975 (unique routes), resulting in four different maps (one for each navigational  
976 condition). Single voxel autocorrelation maps were then averaged across the 19  
977 participants to generate an average group map for each navigation condition.

978

979 Participants completed 16 navigation runs (four in each condition) at their own  
980 pace. Because the conditions varied in difficulty, the average number of TRs  
981 differed across conditions and participants. Every route was 2-10 km long and  
982 the average run (route) length was 137.6 TRs (2 s TRs). The average number of  
983 TRs was lowest in the GPS condition ( $M = 92.13$ ,  $SD = 17.44$ ), followed by the  
984 Familiar condition ( $M = 136.45$ ,  $SD = 39.18$ ), the Mirrored condition ( $M = 155.73$ ,  
985  $SD = 36.84$ ), and the Unfamiliar condition ( $M = 158.78$ ,  $SD = 32.13$ ). In order to  
986 compare single voxel autocorrelation across scanned runs with a similar number  
987 of TRs/lengths, we chose to filter out any runs that were unusually short (that the  
988 participant either didn't complete or completed very quickly). We excluded runs  
989 that were less than 88 TRs long. This resulted in an average of 13.36 runs ( $SD =$



990 1.21) per participant. The GPS runs were disproportionately shorter than the  
991 other conditions, resulting in more GPS runs excluded than other conditions. The  
992 average number of routes included in the following analyses per participant are  
993 as follows: Mirrored (M=3.89, SD=0.31), Unfamiliar (M=3.84, SD=0.50), Familiar  
994 (M=3.68, SD=0.47), GPS (M=1.95, SD=1.22).

995

996 *Computing autocorrelation clusters (Autocorrelation Clustering)*

997 We repeated the single voxel autocorrelation clustering procedure described  
998 above in Dataset 1 to determine clusters of single voxel autocorrelation within  
999 each navigational condition.

1000

1001 ***Relating single voxel autocorrelation to navigation condition***

1002 *Calculating single voxel autocorrelation slopes*

1003 To investigate how the spatial distribution of single voxel autocorrelation is  
1004 related to navigation difficulty, we compared the single voxel autocorrelation (lag  
1005 1) slopes across the four different conditions: GPS, Familiar, Unfamiliar, and  
1006 Mirrored. First, for each participant, we extracted the single voxel autocorrelation  
1007 (lag 1) from every voxel. We averaged the single voxel autocorrelation across all  
1008 voxels on each slice of the hippocampus. We used 3 mm slices in the anterior-  
1009 posterior direction (Y-direction), resulting in thirteen slices. Using a linear  
1010 regression, we calculated the slope coefficient for the single voxel autocorrelation  
1011 across slices for each navigation run. We then repeated the same procedure,  
1012 using 3 mm slices in the medial-lateral direction (X-direction), resulting in 9  
1013 slices. We computed the slopes and compared them across navigation  
1014 conditions and hemispheres.

1015

1016 To test whether there was a significant difference between single voxel  
1017 autocorrelation during different navigation conditions, we ran a mixed effects  
1018 model on the single voxel autocorrelation slopes along the anterior-posterior and  
1019 medial-lateral axes. This analysis was conducted in R (R Core Team, 2019)  
1020 using the afex (Singmann et al., 2020) and the tidyverse packages (Wickham,  
1021 2017).

1022

1023

1024

1025

1026

1027

1028

1029

1030

1031 **References**

- 1032 Arbabshirani, M. R., Damaraju, E., Phlypo, R., Plis, S., Allen, E., Ma, S., Mathalon, D., ...  
1033 & Calhoun, V. D. (2014). Impact of autocorrelation on functional connectivity.  
1034 *NeuroImage*, 102(part2), 294–308.  
1035 <https://doi.org/10.1016/j.neuroimage.2014.07.045>  
1036
- 1037 Arbabshirani, M. R., Preda, A., Vaidya, J. G., Potkin, S. G., Pearlson, G., Voyvodic, J., ...  
1038 & Calhoun, V. D. (2019). Autoconnectivity: A new perspective on human brain  
1039 function. *Journal of neuroscience methods*, 323(15), 68-76.  
1040 <https://doi.org/10.1016/j.jneumeth.2019.03.015>  
1041
- 1042 Barredo, J., Öztekin, I., & Badre, D. (2015). Ventral fronto-temporal pathway supporting  
1043 cognitive control of episodic memory retrieval. *Cerebral Cortex*, 25(4), 1004-  
1044 1019.  
1045
- 1046 Bellmund, J. L., Deuker, L., & Doeller, C. F. (2019). Mapping sequence structure in the  
1047 human lateral entorhinal cortex. *Elife*, 8, e45333.  
1048 <https://doi.org/10.7554/eLife.45333>  
1049
- 1050 Bellmund, J. L., Deuker, L., Schröder, T. N., & Doeller, C. F. (2016). Grid-cell  
1051 representations in mental simulation. *Elife*, 5, e17089.  
1052 <https://doi.org/10.7554/eLife.17089>  
1053
- 1054 Berron, D., Neumann, K., Maass, A., Schütze, H., Fliessbach, K., Kiven, V., ... & Düzel,  
1055 E. (2018). Age-related functional changes in domain-specific medial temporal  
1056 lobe pathways. *Neurobiology of Aging*, 65, 86-97.  
1057 <https://doi.org/10.1016/j.neurobiolaging.2017.12.030>  
1058
- 1058 Blondel, V. D., Guillaume, J.-L., Lambiotte, R., and Lefebvre, E. (2008). Fast Unfolding  
1059 of Communities in Large Networks. *Journal of Statistical Mechanics: Theory and*  
1060 *Experiment*. P10008. <https://doi.org/10.1088/1742-5468/2008/10/p10008>.  
1061
- 1062 Bollmann, S., Puckett, A.M., Cunnington, R., Barth, M. (2018). Serial correlations in  
1063 single-subject fMRI with sub-second TR. *Neuroimage*, 166(1), 152-166.  
1064 <https://doi.org/10.1016/j.neuroimage.2017.10.043>.
- 1065 Brun, V. H., Solstad, T., Kjelstrup, K. B., Fyhn, M., Witter, M. P., Moser, E. I., & Moser,  
1066 M. B. (2008). Progressive increase in grid scale from dorsal to ventral medial  
1067 entorhinal cortex. *Hippocampus*, 18(12), 1200-1212.
- 1068 Brunec, I. K., Bellana, B., Ozubko, J. D., Man, V., Robin, J., Liu, Z. X., Grady, C., ... &  
1069 Moscovitch, M. (2018). Multiple scales of representation along the hippocampal  
1070 anteroposterior axis in humans. *Current Biology*, 28(13): 2129–2135.  
1071 [https://doi.org/10.1016/j.cub.20\\_18.05.016](https://doi.org/10.1016/j.cub.20_18.05.016)  
1072
- 1073 Brunec, I. K., & Momennejad, I. (2019). Predictive representations in hippocampal and  
1074 prefrontal hierarchies. *bioRxiv*, 786434.  
1075
- 1076 Bullmore, E., Long, C., Suckling, J., Fadili, J., Calvert, G., Zelaya, F., ... & Brammer, M.  
1077 (2001). Colored noise and computational inference in neurophysiological (fMRI)  
1078 time series analysis: resampling methods in time and wavelet domains. *Human*  
1079 *brain mapping*, 12(2), 61-78.

- 1080  
1081 Campbell, K., Grigg, O., Saverino, C., Churchill, N., & Grady, C. (2013). Age differences  
1082 in the intrinsic functional connectivity of default network subsystems. *Frontiers in*  
1083 *aging neuroscience*, 5, 73. <https://doi.org/10.3389/fnagi.2013.00073>  
1084  
1085 Cavanagh, S. E., Wallis, J. D., Kennerley, S. W., & Hunt, L. T. (2016). Autocorrelation  
1086 structure at rest predicts value correlates of single neurons during reward-guided  
1087 choice. *eLife*, 5, e18937. <https://doi.org/10.7554/eLife.18937>.  
1088  
1089 Collin, S. H., Milivojevic, B., & Doeller, C. F. (2015). Memory hierarchies map onto the  
1090 hippocampal long axis in humans. *Nature neuroscience*, 18(11), 1562-1564.  
1091 <https://doi.org/10.1038/nn.4138>  
1092  
1093 Cox, R. W. (1996). AFNI: software for analysis and visualization of functional magnetic  
1094 resonance neuroimages. *Computers and Biomedical research*, 29(3), 162-173.  
1095  
1096 Doeller, C. F., King, J. A., & Burgess, N. (2008). Parallel striatal and hippocampal  
1097 systems for landmarks and boundaries in spatial memory. *Proceedings of the*  
1098 *National Academy of Sciences*, 105(15), 5915-5920.  
1099 <https://doi.org/10.1073/pnas.0801489105>  
1100  
1101 DuBrow S, Davachi L. (2013). The influence of context boundaries on memory for the  
1102 sequential order of events. *J Exp Psychol Gen*, 142(4), 1277-86. doi:  
1103 10.1037/a0034024.  
1104  
1105 Evensmoen, H. R., Lehn, H., Xu, J., Witter, M. P., Nadel, L., & Håberg, A. K. (2013). The  
1106 anterior hippocampus supports a coarse, global environmental representation  
1107 and the posterior hippocampus supports fine-grained, local environmental  
1108 representations. *Journal of cognitive neuroscience*, 25(11), 1908-1925.  
1109 [https://doi.org/10.1162/jocn\\_a\\_00436](https://doi.org/10.1162/jocn_a_00436)  
1110  
1111 Ezzyat Y, Davachi L. (2014). Similarity breeds proximity: pattern similarity within and  
1112 across contexts is related to later mnemonic judgments of temporal proximity.  
1113 *Neuron*, 81(5), 1179-1189. doi: 10.1016/j.neuron.2014.01.042.  
1114  
1115 Glasser, M. F., Smith, S. M., Marcus, D. S., Andersson, J. L., Auerbach, E. J., Behrens,  
1116 T. E., ... & Van Essen, D. C. (2016). The human connectome project's  
1117 neuroimaging approach. *Nature neuroscience*, 19(9), 1175-1187.  
1118 <https://doi.org/10.1038/nn.4361>  
1119  
1120 Glasser, M. F., Sotiropoulos, S. N., Wilson, J. A., Coalson, T. S., Fischl, B., Andersson,  
1121 J. L., ... & Wu-Minn HCP Consortium. (2013). The minimal preprocessing  
1122 pipelines for the Human Connectome Project. *Neuroimage*, 80, 105-124.  
1123 <https://doi.org/10.1016/j.neuroimage.2013.04.127>  
1124  
1125 Grady, C. L. (2020). Meta-analytic and functional connectivity evidence from functional  
1126 magnetic resonance imaging for an anterior to posterior gradient of function  
1127 along the hippocampal axis. *Hippocampus*, 30(5), 456-471.  
1128 <https://doi.org/10.1002/hipo.23164>  
1129

- 1130 Gothard, K. M., Skaggs, W. E., & McNaughton, B. L. (1996). Dynamics of mismatch  
1131 correction in the hippocampal ensemble code for space: interaction between path  
1132 integration and environmental cues. *Journal of Neuroscience*, *16*(24), 8027-8040.  
1133 <https://doi.org/10.1523/JNEUROSCI.16-24-08027.1996>  
1134
- 1135 Griffanti, L., Salimi-Khorshidi, G., Beckmann, C. F., Auerbach, E. J., Douaud, G.,  
1136 Sexton, C. E., ... & Smith, S. M. (2014). ICA-based artefact removal and  
1137 accelerated fMRI acquisition for improved resting state network  
1138 imaging. *Neuroimage*, *95*, 232-247.  
1139 <https://doi.org/10.1016/j.neuroimage.2014.03.034>  
1140
- 1141 Hafting, T., Fyhn, M., Molden, S., Moser, M. B., & Moser, E. I. (2005). Microstructure of a  
1142 spatial map in the entorhinal cortex. *Nature*, *436*(7052), 801-806.  
1143 <https://doi.org/10.1038/nature03721>  
1144
- 1145 Hasselmo, M. E. (2008). Grid cell mechanisms and function: contributions of entorhinal  
1146 persistent spiking and phase resetting. *Hippocampus*, *18*(12), 1213-1229.  
1147 <https://doi.org/10.1002/hipo.20512>  
1148
- 1149 Hirshhorn, M., Grady, C., Rosenbaum, R. S., Winocur, G., & Moscovitch, M. (2012).  
1150 Brain regions involved in the retrieval of spatial and episodic details associated  
1151 with a familiar environment: an fMRI study. *Neuropsychologia*, *50*(13), 3094-  
1152 3106. <https://doi.org/10.1016/j.neuropsychologia.2012.08.008>  
1153
- 1154 Hrybouski, S., MacGillivray, M., Huang, Y., Madan, C. R., Carter, R., Seres, P., &  
1155 Malykhin, N. V. (2019). Involvement of hippocampal subfields and anterior-  
1156 posterior subregions in encoding and retrieval of item, spatial, and associative  
1157 memories: longitudinal versus transverse axis. *NeuroImage*, *191* (1), 568-586.  
1158 <https://doi.org/10.1016/j.neuroimage.2019.01.061>  
1159
- 1160 Igarashi, K. M., Ito, H. T., Moser, E. I., & Moser, M. B. (2014). Functional diversity along  
1161 the transverse axis of hippocampal area CA1. *FEBS letters*, *588*(15), 2470-2476.  
1162 <https://doi.org/10.1016/j.febslet.2014.06.004>  
1163
- 1164 Irish, M., & Vatansever, D. (2020). Rethinking the episodic-semantic distinction from a  
1165 gradient perspective. *Current Opinion in Behavioral Sciences*, *32*, 43-49.  
1166 <https://doi.org/10.1016/j.cobeha.2020.01.016>  
1167
- 1168 Jacob, A. D., & Josselyn, S. A. (2020). Why Have Two When One Will Do? Comparing  
1169 Task Representations across Amygdala and Prefrontal Cortex in Single Neurons  
1170 and Neuronal Populations. *Neuron*, *107*(4), 597-599.  
1171 <https://doi.org/10.1016/j.neuron.2020.07.038>  
1172
- 1173 James, O., Park, H., & Kim, S. G. (2019). Impact of sampling rate on statistical  
1174 significance for single subject fMRI connectivity analysis. *Human brain*  
1175 *mapping*, *40*(11), 3321-3337. <https://doi.org/10.1002/hbm.24600>.  
1176
- 1177 Jung, M. W., Wiener, S. I., & McNaughton, B. L. (1994). Comparison of spatial firing  
1178 characteristics of units in dorsal and ventral hippocampus of the rat. *Journal of*  
1179 *Neuroscience*, *14*(12), 7347-7356.  
1180

- 1181 Kjelstrup, K. B., Solstad, T., Brun, V. H., Hafting, T., Leutgeb, S., Witter, M. P., ... &  
1182 Moser, M. B. (2008). Finite scale of spatial representation in the  
1183 hippocampus. *Science*, 321(5885), 140-143.  
1184 <https://doi.org/10.1126/science.1157086>  
1185
- 1186 Kok, P., Rait, L. I., & Turk-Browne, N. B. (2020). Content-based dissociation of  
1187 hippocampal involvement in prediction. *Journal of Cognitive Neuroscience*, 32(3),  
1188 527-545. [https://doi.org/10.1162/jocn\\_a\\_01509](https://doi.org/10.1162/jocn_a_01509)  
1189
- 1190 Komorowski, R. W., Garcia, C. G., Wilson, A., Hattori, S., Howard, M. W., &  
1191 Eichenbaum, H. (2013). Ventral hippocampal neurons are shaped by experience  
1192 to represent behaviorally relevant contexts. *Journal of Neuroscience*, 33(18),  
1193 8079-8087. <https://doi.org/10.1523/JNEUROSCI.5458-12.2013>  
1194
- 1195 Kyle, C. T., Stokes, J. D., Lieberman, J. S., Hassan, A. S., & Ekstrom, A. D. (2015).  
1196 Successful retrieval of competing spatial environments in humans involves  
1197 hippocampal pattern separation mechanisms. *Elife*, 4, e10499.  
1198 <https://doi.org/10.7554/eLife.10499>  
1199
- 1200 Laurens R Krol (2021). Permutation Test (<https://github.com/lrkrol/permutationTest>),  
1201 GitHub. Retrieved February 16, 2021.  
1202
- 1203 Lee, A. C., Yeung, L. K., & Barense, M. D. (2012). The hippocampus and visual  
1204 perception. *Frontiers in human neuroscience*, 6, 91.  
1205 <https://doi.org/10.3389/fnhum.2012.00091>  
1206
- 1207 Lenoski, B., Baxter, L. C., Karam, L. J., Maisog, J., & Debbins, J. (2008). On the  
1208 performance of autocorrelation estimation algorithms for fMRI analysis. *IEEE*  
1209 *Journal of Selected Topics in Signal Processing*, 2(6), 828-838.  
1210 <https://doi.org/10.1109/jstsp.2008.2007819>.  
1211
- 1212 Leutgeb, S., Leutgeb, J. K., Treves, A., Moser, M. B., & Moser, E. I. (2004). Distinct  
1213 ensemble codes in hippocampal areas CA3 and CA1. *Science*, 305(5688), 1295-  
1214 1298. <https://doi.org/10.1126/science.1100265>  
1215
- 1216 Lund, T. E., Madsen, K. H., Sidaros, K., Luo, W. L., & Nichols, T. E. (2006). Non-white  
1217 noise in fMRI: does modelling have an impact? *Neuroimage*, 29(1), 54-66.  
1218 <https://doi.org/10.1016/j.neuroimage.2005.07.005>.  
1219
- 1220 Maass, A., Berron, D., Libby, L. A., Ranganath, C., & Düzel, E. (2015). Functional  
1221 subregions of the human entorhinal cortex. *Elife*, 4, e06426.  
1222 <https://doi.org/10.7554/eLife.06426>  
1223
- 1224 Maurer, A. P., VanRhoads, S. R., Sutherland, G. R., Lipa, P., & McNaughton, B. L.  
1225 (2005). Self-motion and the origin of differential spatial scaling along the septo-  
1226 temporal axis of the hippocampus. *Hippocampus*, 15(7), 841-852.  
1227 <https://doi.org/10.1002/hipo.20114>  
1228
- 1229 Montchal, M. E., Reagh, Z. M., & Yassa, M. A. (2019). Precise temporal memories are  
1230 supported by the lateral entorhinal cortex in humans. *Nature neuroscience*, 22(2),  
1231 284-288. <https://doi.org/10.1038/s41593-018-0303-1>

- 1232  
1233 Morrissey, M. D., Insel, N., & Takehara-Nishiuchi, K. (2017). Generalizable knowledge  
1234 outweighs incidental details in prefrontal ensemble code over time. *Elife*, 6,  
1235 e22177. <https://doi.org/10.7554/eLife.22177>  
1236  
1237 Nadel, L., Hoscheidt, S., & Ryan, L.R. (2013). Spatial cognition and the hippocampus:  
1238 the anterior–posterior axis. *Journal of Cognitive Neuroscience*, 25(1), 22-28.  
1239 [https://doi.org/10.1162/jocn\\_a\\_00313](https://doi.org/10.1162/jocn_a_00313).  
1240  
1241 Navarro Schröder, T., Haak, K. V., Jimenez, N. I. Z., Beckmann, C. F., & Doeller, C. F.  
1242 (2015). Functional topography of the human entorhinal cortex. *Elife*, 4, e06738.  
1243 <https://doi.org/10.7554/eLife.06738>  
1244  
1245 Nielson, D. M., Smith, T. A., Sreekumar, V., Dennis, S., & Sederberg, P. B. (2015).  
1246 Human hippocampus represents space and time during retrieval of real-world  
1247 memories. *Proceedings of the National Academy of Sciences*, 112(35), 11078-  
1248 11083. <https://doi.org/10.1073/pnas.1507104112>  
1249  
1250 Nilssen, E. S., Doan, T. P., Nigro, M. J., Ohara, S., & Witter, M. P. (2019). Neurons and  
1251 networks in the entorhinal cortex: A reappraisal of the lateral and medial  
1252 entorhinal subdivisions mediating parallel cortical  
1253 pathways. *Hippocampus*, 29(12), 1238-1254. <https://doi.org/10.1002/hipo.23145>  
1254  
1255 Olsen, R. K., Yeung, L. K., Noly-Gandon, A., D'Angelo, M. C., Kacollja, A., Smith, V. M.,  
1256 ... & Barense, M. D. (2017). Human anterolateral entorhinal cortex volumes are  
1257 associated with cognitive decline in aging prior to clinical diagnosis. *Neurobiology*  
1258 *of aging*, 57, 195-205. <https://doi.org/10.1016/j.neurobiolaging.2017.04.025>  
1259  
1260 Peer, M., Ron, Y., Monsa, R., & Arzy, S. (2019). Processing of different spatial scales in  
1261 the human brain. *Elife*, 8, e47492. <https://doi.org/10.7554/eLife.47492>  
1262  
1263 Poppenk, J., Evensmoen, H. R., Moscovitch, M., & Nadel, L. (2013). Long-axis  
1264 specialization of the human hippocampus. *Trends in cognitive sciences*, 17(5),  
1265 230-240. <https://doi.org/10.1016/j.tics.2013.03.005>  
1266  
1267 Power, J. D., Barnes, K. A., Snyder, A. Z., Schlaggar, B. L., & Petersen, S. E. (2012).  
1268 Spurious but systematic correlations in functional connectivity MRI networks  
1269 arise from subject motion. *Neuroimage*, 59(3), 2142-2154.  
1270 <https://doi.org/10.1016/j.neuroimage.2011.10.018>  
1271  
1272 Purdon, P. L., & Weiskoff, R. M. (1998). Effect of temporal autocorrelation due to  
1273 physiological noise and stimulus paradigm on voxel-level false-positive rates in  
1274 fMRI. *Human brain mapping*, 6(4), 239-249. [https://doi.org/10.1002/\(SICI\)1097-0193\(1998\)6:4<239::AID-HBM4>3.0.CO;2-4](https://doi.org/10.1002/(SICI)1097-0193(1998)6:4<239::AID-HBM4>3.0.CO;2-4)  
1275  
1276  
1277 R Core Team (2019). R: A language and environment for statistical  
1278 computing. R Foundation for Statistical Computing, Vienna,  
1279 Austria. URL <https://www.R-project.org/>.  
1280  
1281 Rajapakse, J. C., Kruggel, F., Maisog, J. M., & Yves von Cramon, D. (1998). Modeling  
1282 hemodynamic response for analysis of functional MRI time-series. *Human brain*

- 1283 *mapping*, 6(4), 283-300. [https://doi.org/3.0.co;2-#>10.1002/\(sici\)1097-0193\(1998\)6:4<283::aid-hbm7>3.0.co;2-#](https://doi.org/3.0.co;2-#>10.1002/(sici)1097-0193(1998)6:4<283::aid-hbm7>3.0.co;2-#)
- 1284
- 1285
- 1286 Raut, R. V., Snyder, A. Z., & Raichle, M. E. (2020). Hierarchical dynamics as a  
1287 macroscopic organizing principle of the human brain. *Proceedings of the National*  
1288 *Academy of Sciences*, 117(34), 20890-20897.  
1289 <https://doi.org/10.1073/pnas.2003383117>
- 1290
- 1291 Robin, J., & Moscovitch, M. (2017). Details, gist and schema: hippocampal–neocortical  
1292 interactions underlying recent and remote episodic and spatial memory. *Current*  
1293 *opinion in behavioral sciences*, 17, 114-123.  
1294 <https://doi.org/10.1016/j.cobeha.2017.07.016>
- 1295
- 1296 Salimi-Khorshidi, G., Douaud, G., Beckmann, C. F., Glasser, M. F., Griffanti, L., & Smith,  
1297 S. M. (2014). Automatic denoising of functional MRI data: combining independent  
1298 component analysis and hierarchical fusion of classifiers. *Neuroimage*, 90, 449-  
1299 468. <https://doi.org/10.1016/j.neuroimage.2013.11.046>
- 1300
- 1301 Schapiro, A. C., Turk-Browne, N. B., Botvinick, M. M., & Norman, K. A. (2017).  
1302 Complementary learning systems within the hippocampus: a neural network  
1303 modelling approach to reconciling episodic memory with statistical  
1304 learning. *Philosophical Transactions of the Royal Society B: Biological*  
1305 *Sciences*, 372(1711), 20160049.
- 1306
- 1307 Singmann, H., Bolker, B., Westfall, J., Aust, F., & Ben-Shachar, M. S. (2020). afex:  
1308 Analysis of Factorial Experiments. R package version 0.28-0. [https://CRAN.R-](https://CRAN.R-project.org/package=afex)  
1309 [project.org/package=afex](https://CRAN.R-project.org/package=afex)
- 1310
- 1311 Smith, S. M., Beckmann, C. F., Andersson, J., Auerbach, E. J., Bijsterbosch, J., Douaud,  
1312 G., ... & WU-Minn HCP Consortium. (2013). Resting-state fMRI in the human  
1313 connectome project. *Neuroimage*, 80, 144-  
1314 168. <https://doi.org/10.1016/j.neuroimage.2013.05.039>.
- 1315
- 1316 Strange, B. A., Witter, M. P., Lein, E. S., & Moser, E. I. (2014). Functional organization of  
1317 the hippocampal longitudinal axis. *Nature Reviews Neuroscience*, 15(10), 655-  
1318 669. <https://doi.org/10.1038/nrn3785>
- 1319 Tsao, A., Sugar, J., Lu, L., Wang, C., Knierim, J. J., Moser, M. B., & Moser, E. I. (2018).  
1320 Integrating time from experience in the lateral entorhinal  
1321 cortex. *Nature*, 561(7721), 57-62. <https://doi.org/10.1038/s41586-018-0459-6>
- 1322 Vaidya, A. R., & Badre, D. (2020). Neural systems for memory-based value judgment  
1323 and decision-making. *Journal of cognitive neuroscience*, 32(10), 1896–1923.  
1324 [https://doi.org/10.1162/jocn\\_a\\_01595](https://doi.org/10.1162/jocn_a_01595)
- 1325
- 1326 Van Essen, D. C., Smith, S. M., Barch, D. M., Behrens, T. E., Yacoub, E., Ugurbil, K., &  
1327 Wu-Minn HCP Consortium. (2013). The WU-Minn human connectome project: an  
1328 overview. *Neuroimage*, 80, 62-79.  
1329 <https://doi.org/10.1016/j.neuroimage.2013.05.041>.
- 1330
- 1331 Wickham, H. (2017). tidyverse: Easily Install and Load the 'Tidyverse'. R package  
1332 version 1.2.1. <https://CRAN.R-project.org/package=tidyverse>
- 1333

- 1334 Wickramaarachchi, C., Frincu, M., Small, P., & Prasanna, V. K. (2014, September). Fast  
1335 parallel algorithm for unfolding of communities in large graphs. In *2014 IEEE*  
1336 *High Performance Extreme Computing Conference (HPEC)* (pp. 1-6). IEEE.  
1337 <https://doi.org/10.1109/hpec.2014.7040973>.  
1338
- 1339 Witter, M. P., & Amaral, D. G. (2021). The entorhinal cortex of the monkey: VI.  
1340 Organization of projections from the hippocampus, subiculum, presubiculum, and  
1341 parasubiculum. *Journal of Comparative Neurology*, *529*(4), 828-852.  
1342 <https://doi.org/10.1002/cne.24983>  
1343
- 1344 Witter, M. P., Doan, T. P., Jacobsen, B., Nilssen, E. S., & Ohara, S. (2017). Architecture  
1345 of the entorhinal cortex a review of entorhinal anatomy in rodents with some  
1346 comparative notes. *Frontiers in Systems Neuroscience*, *11*, 46.  
1347 <https://doi.org/10.3389/fnsys.2017.00046>.  
1348
- 1349 Yassa, M. A., & Stark, C. E. (2011). Pattern separation in the hippocampus. *Trends in*  
1350 *neurosciences*, *34*(10), 515-525. <https://doi.org/10.1016/j.tins.2011.06.006>  
1351
- 1352 Yeung, L. K., Olsen, R. K., Hong, B., Mihajlovic, V., D'Angelo, M. C., Kacollja, A., ... &  
1353 Barensse, M. D. (2019). Object-in-place memory predicted by anterolateral  
1354 entorhinal cortex and parahippocampal cortex volume in older adults. *Journal of*  
1355 *Cognitive Neuroscience*, *31*(5), 711-729. [https://doi.org/10.1162/jocn\\_a\\_01385](https://doi.org/10.1162/jocn_a_01385)  
1356
- 1357 Yeung, L. K., Olsen, R. K., Bild-Enkin, H. E., D'Angelo, M. C., Kacollja, A., McQuiggan,  
1358 D. A., ... & Barensse, M. D. (2017). Anterolateral entorhinal cortex volume  
1359 predicted by altered intra-item configural processing. *Journal of*  
1360 *Neuroscience*, *37*(22), 5527-5538. [https://doi.org/10.1523/JNEUROSCI.3664-](https://doi.org/10.1523/JNEUROSCI.3664-16.2017)  
1361 [16.2017](https://doi.org/10.1523/JNEUROSCI.3664-16.2017)
